# Supplementary material for: Elevated dimethylarginine, ATP, cytokines, metabolic remodeling involving tryptophan metabolism and potential microglial inflammation characterize primary open angle glaucoma
Source: PubMed Central journal article supplement (PMC8105335; doi:10.1038/s41598-021-89137-z), 2021-05-07
Supplement: 41598_2021_89137_MOESM4_ESM.pdf [file 41598_2021_89137_MOESM4_ESM.pdf]

**Supplementary Fig. S4** - : PCA analysis and significant metabolites of condition media of N9 microglial cells treated with ATP100uM (Positive mode)  
All the figures in Supplementary Fig.S4 was generated using MetaboAnalyst 5.0 (Version-5.0; URL link: <https://www.metaboanalyst.ca/>).

## **Elevated Dimethylarginine, ATP, cytokines, metabolic remodeling involving tryptophan metabolism and potential microglial inflammation characterize Primary Open Angle Glaucoma**

- Sujith Kumar Pulukool<sup>1</sup>, Sai Krishna Srimadh Bhagavatham<sup>1</sup>, Vishnu Kannan<sup>1,2</sup>, Piruthivi Sukumar<sup>3</sup>, Rajesh Babu Dandamudi<sup>4,5</sup>, Shamika Ghaisas<sup>6</sup>, Haripriya Kunchala<sup>6</sup>, Darshan Saieesh<sup>1</sup>, Ashwin Ashok Naik<sup>1</sup>, Ashish Pargaonkar<sup>7</sup>, Anuj Sharma<sup>6\*</sup>, Venketesh Sivaramakrishnan<sup>1\*</sup>
- <sup>1</sup> Disease Biology Lab, SSSIHL-Agilent Center for Excellence in Multiomics and Cell Sciences, Dept. of Biosciences, Sri Sathya Sai Institute of Higher Learning, Prasanthi Nilayam, Andhra Pradesh, India, 515 134.
- <sup>2</sup> Current address: Dept. of Botany/Biotechnology, CMS College, Kottayam. India 686 001.
- <sup>3</sup> Leeds institute of Cardiovascular and Metabolic medicine, School of medicine, University of Leeds, Leeds, UK
- <sup>4</sup> Previous Address: SSSIHL-Agilent Center for Excellence in Multiomics and Cell Science, Dept. of Chemistry, Sri Sathya Sai Institute of Higher Learning, Prasanthi Nilayam, Andhra Pradesh, India, 515 134.
- <sup>5</sup> Current address: Phenomenex India, Hyderabad, Telangana, India- 500 084.
- <sup>6</sup> Department of Ophthalmology, Sri Sathya Sai Institute of Higher Medical Sciences, Prasanthi Gram, Andhra Pradesh, India, 515 134.
- <sup>7</sup> Application Division, Agilent Technologies Ltd., Bengaluru, India.
- \*To whom correspondence has to be send: Dr.Venketesh Sivaramakrishnan
- [svenketesh@sssihl.edu.in](mailto:svenketesh@sssihl.edu.in), [s.venketesh@gmail.com](mailto:s.venketesh@gmail.com), and
- Dr. Anuj Sharma [anujsharma85@gmail.com](mailto:anujsharma85@gmail.com)
- Venketesh Sivaramakrishnan ORCID- 0000-0003-3094-5905

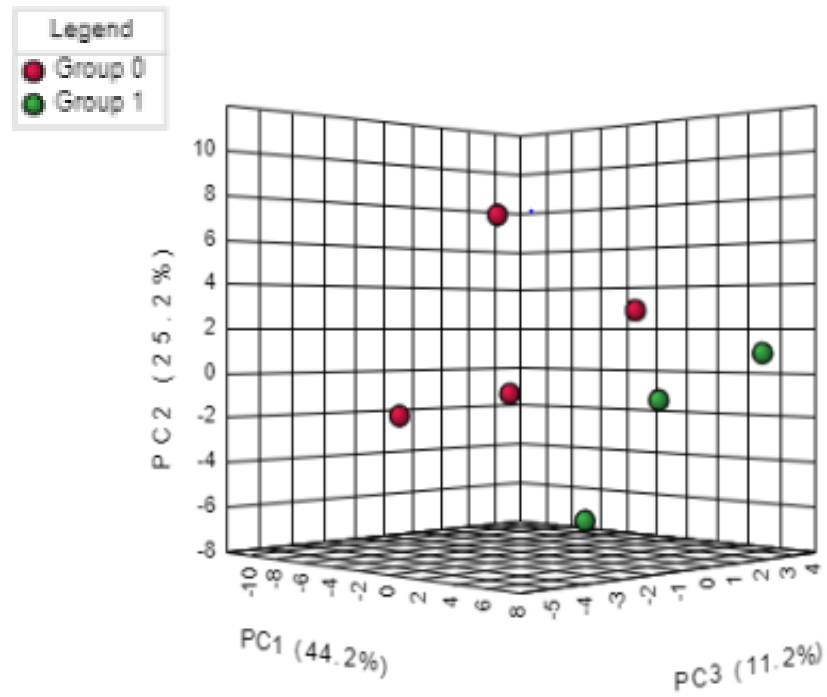

**Supplementary Fig.S4:** PCA plot of the control (red color) and condition media of N9 microglial cells treated with ATP100uM (Positive mode)

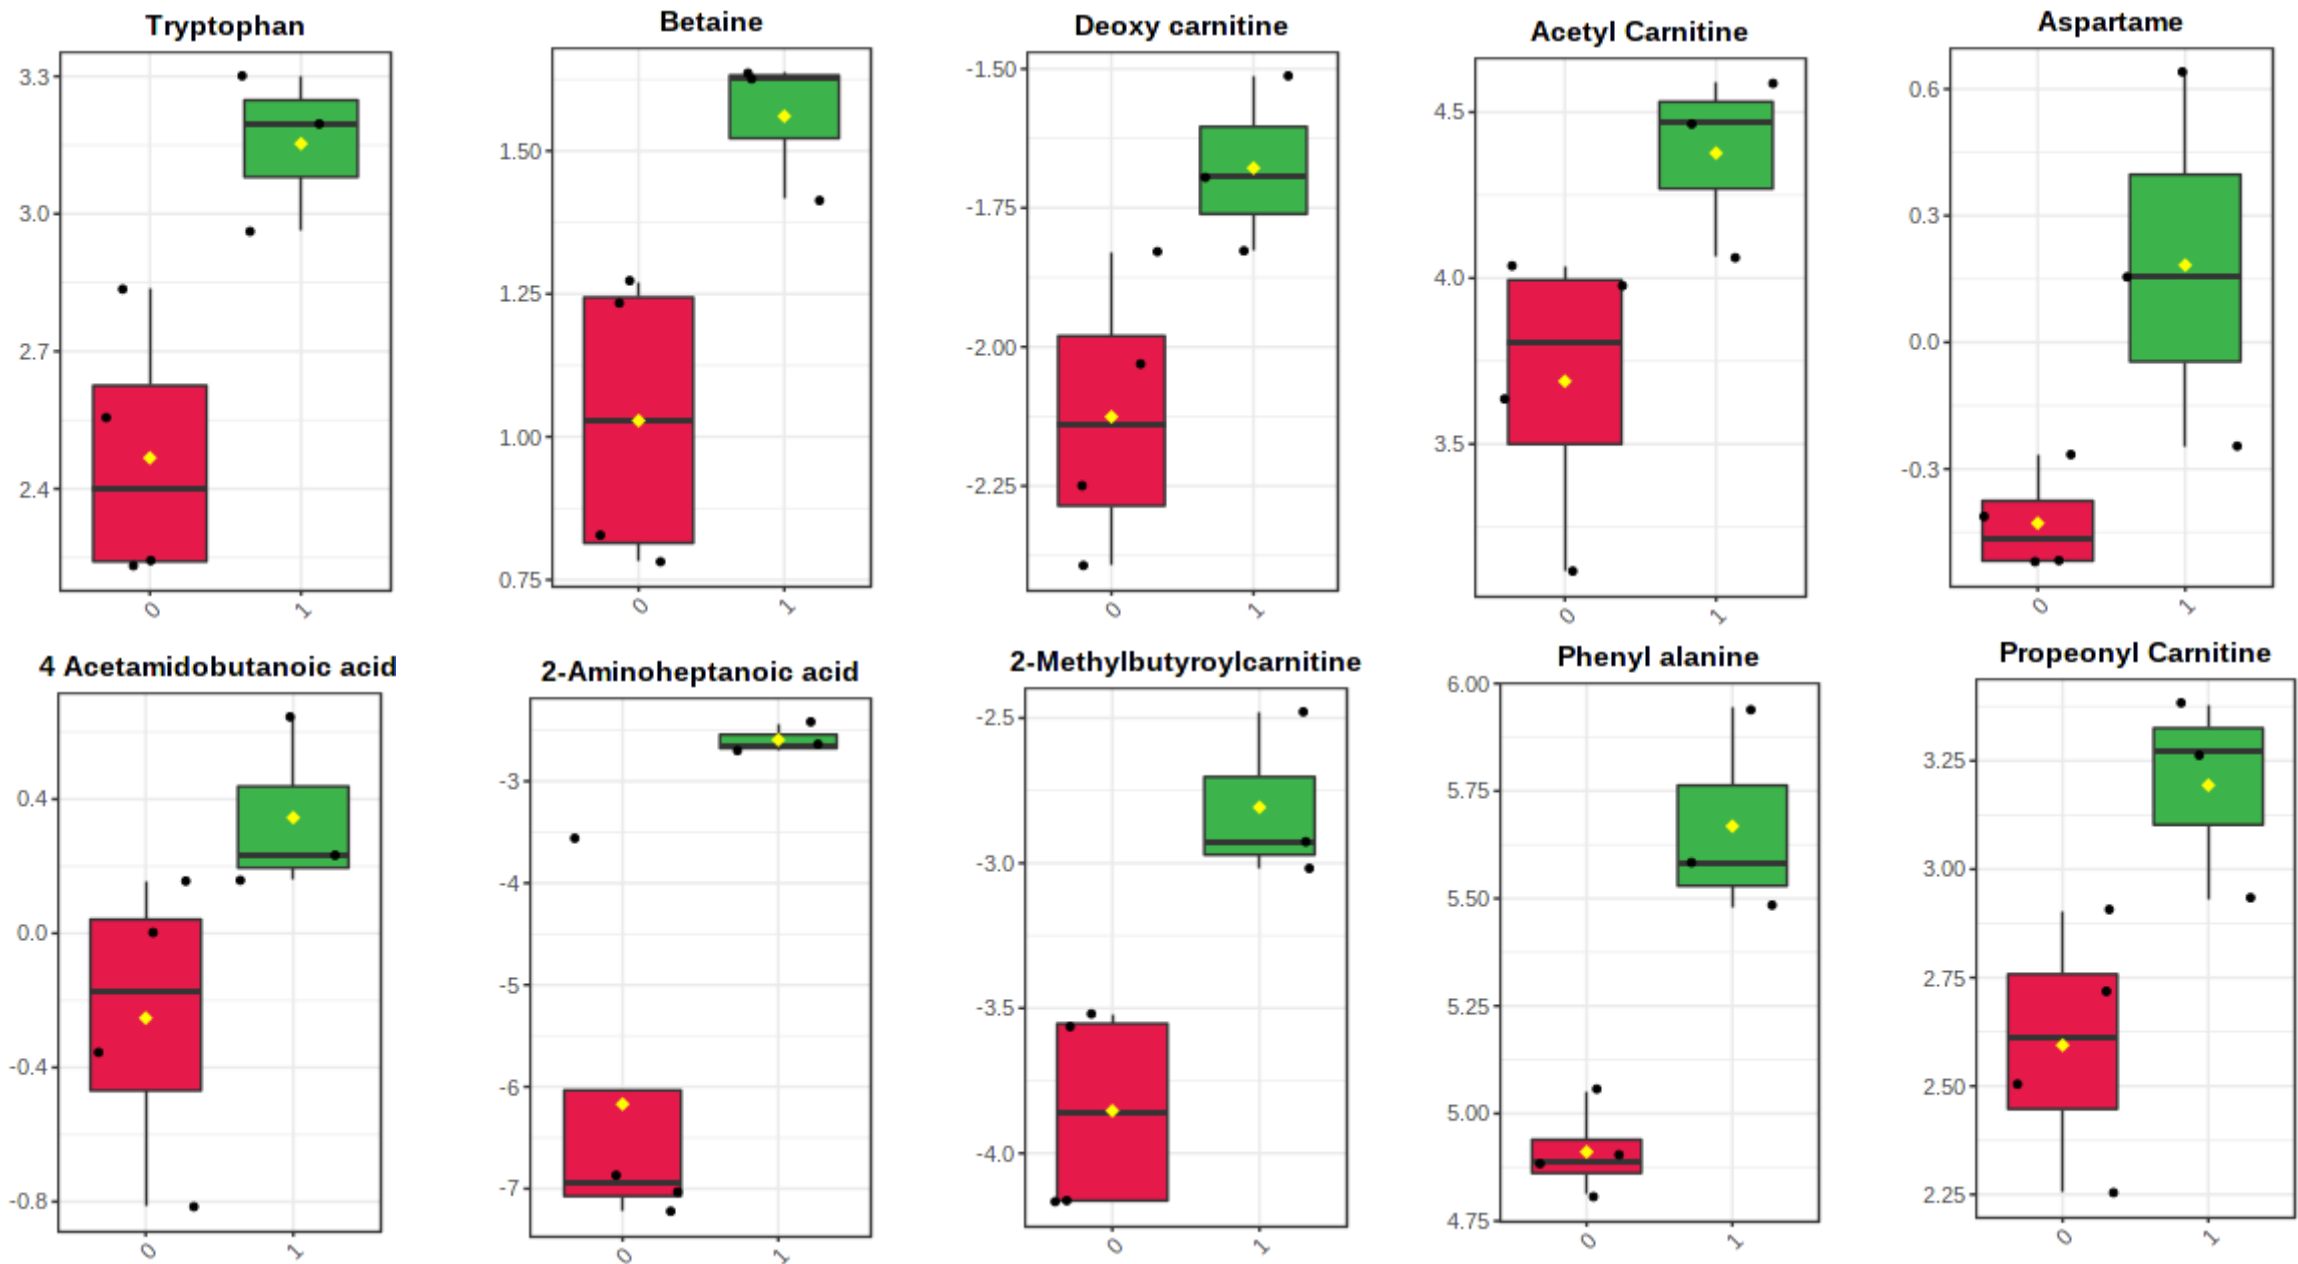

**Supplementary Fig. S4:** showing 22 significant differential metabolites in the treated (ATP100  $\mu$ m) and untreated groups (control) in Positive mode  
 0- Control ; 1- ATP100uM

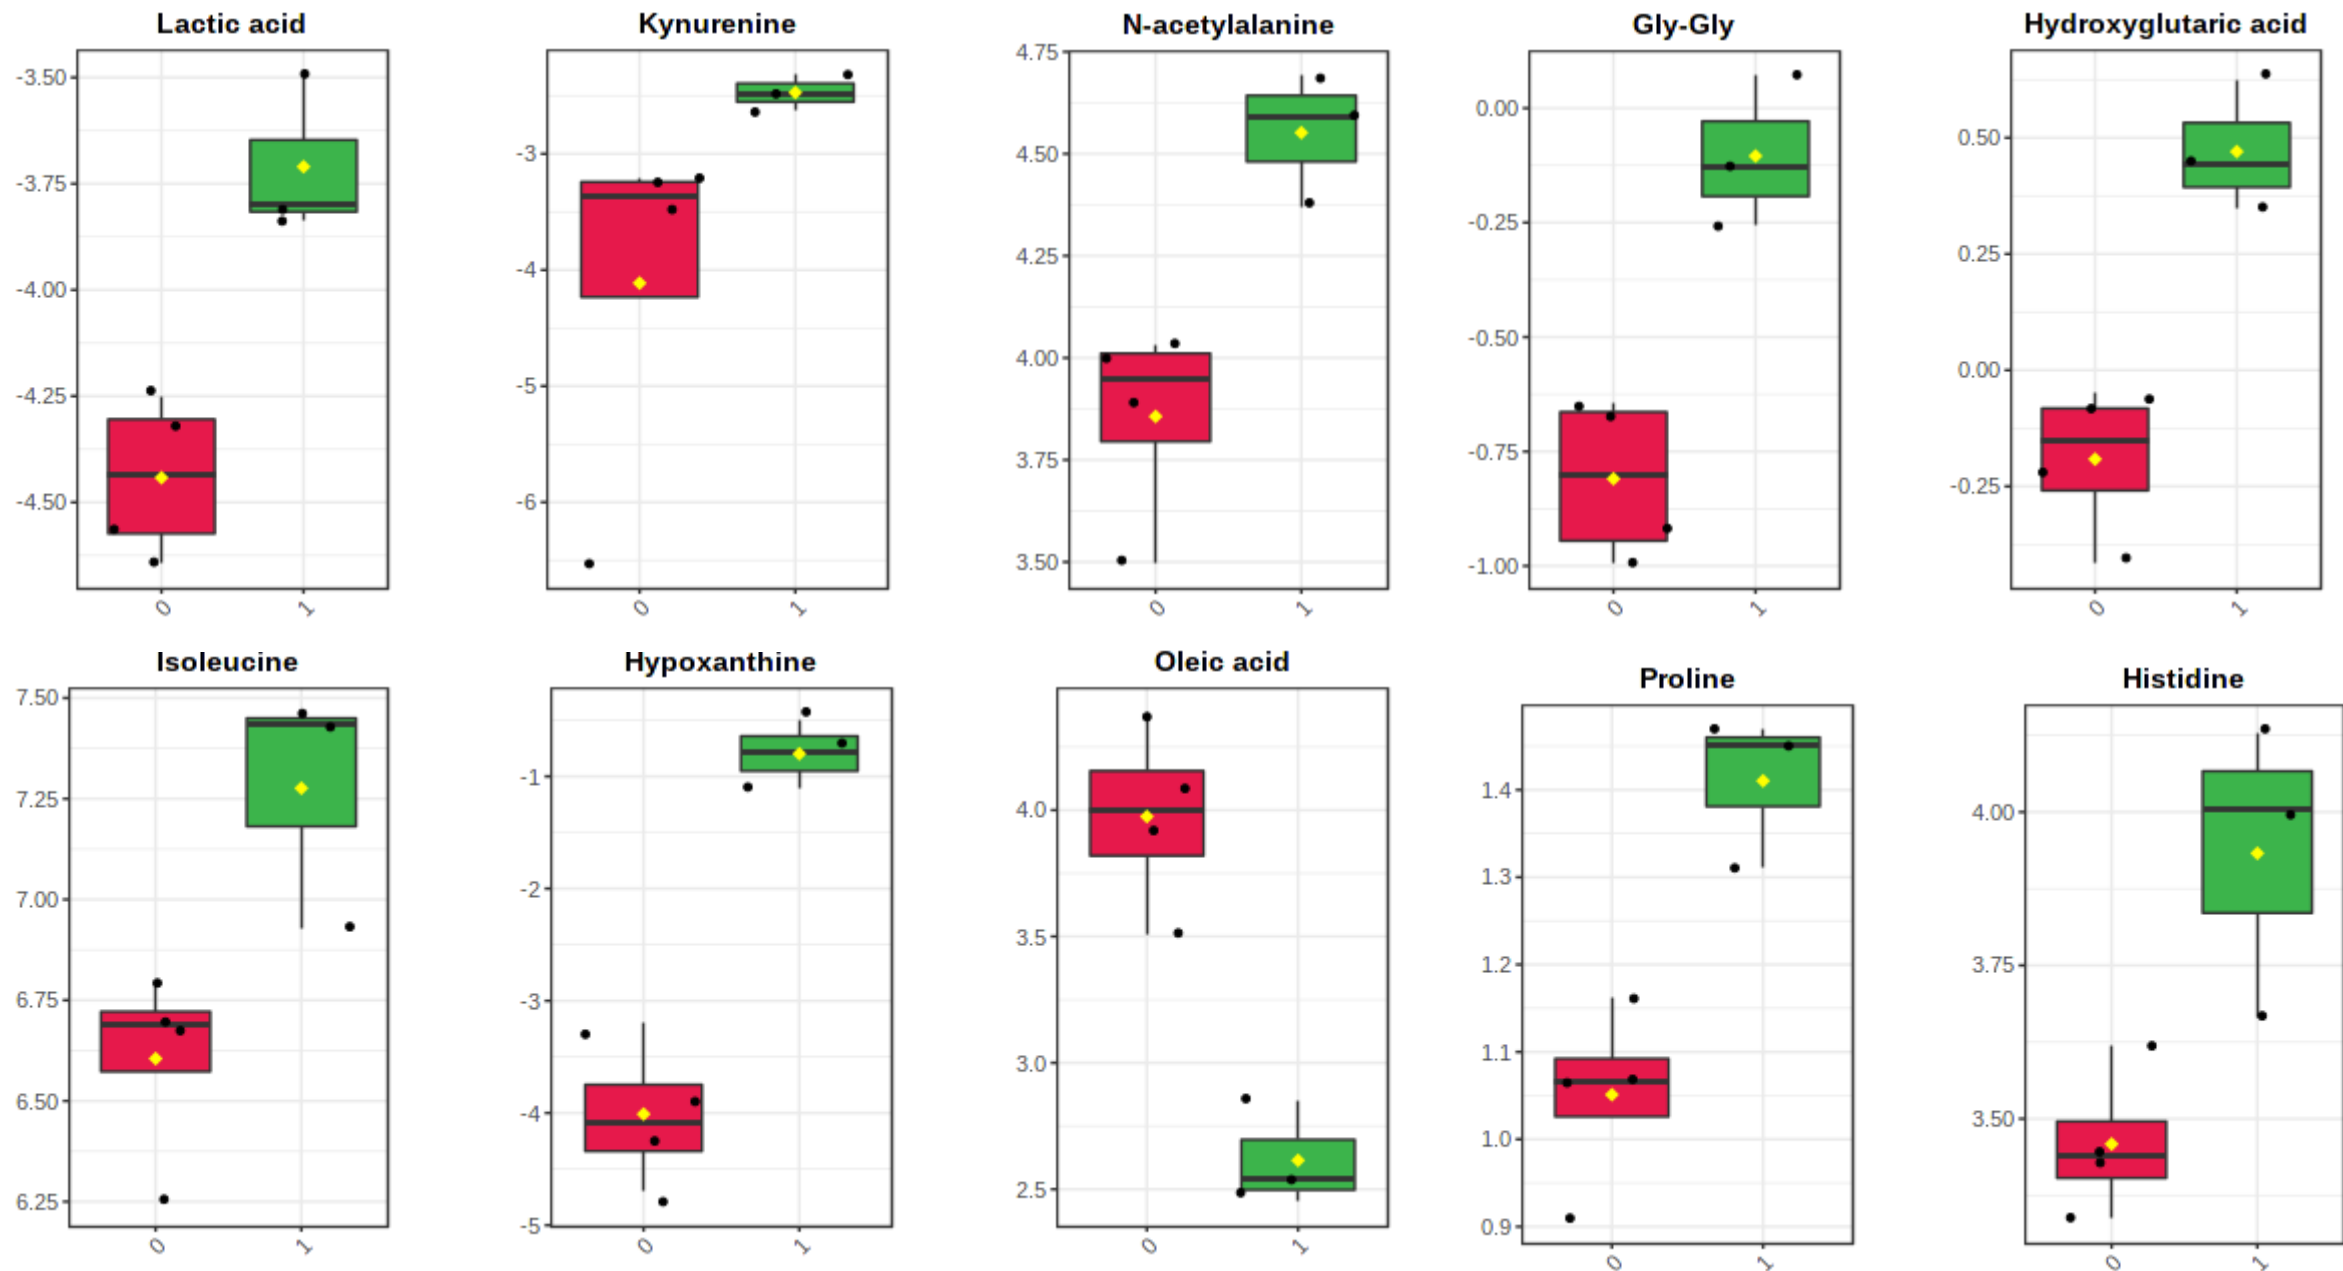

**Supplementary Fig. S4:** showing 22 significant differential metabolites in the treated (ATP100  $\mu$ m) and untreated groups (control) In positive mode.  
 0- Control ; 1- ATP100uM

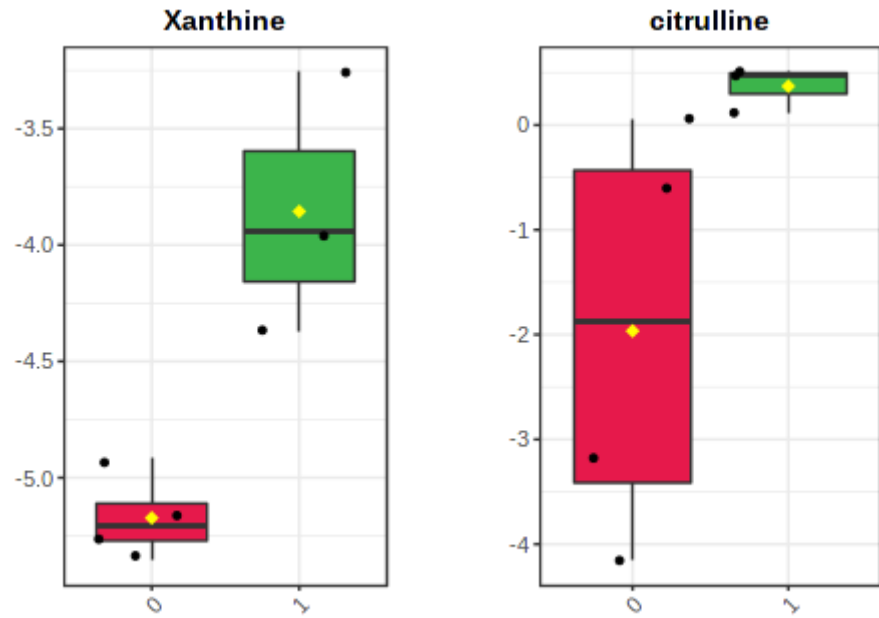

0- Control ; 1- ATP100uM

**Supplementary Fig. S4:** showing 22 significant differential metabolites in the treated (ATP100  $\mu$ m) and untreated groups (control) in positive mode
