# Supplementary material for: Elevated dimethylarginine, ATP, cytokines, metabolic remodeling involving tryptophan metabolism and potential microglial inflammation characterize primary open angle glaucoma
Source: PubMed Central journal article supplement (PMC8105335; doi:10.1038/s41598-021-89137-z), 2021-05-07
Supplement: 41598_2021_89137_MOESM6_ESM.pdf [file 41598_2021_89137_MOESM6_ESM.pdf]

**Supplementary Table S1:** Showing all the significant transcriptomic, proteomic and metabolomics pathways.

**Elevated Dimethylarginine, ATP, cytokines, metabolic remodeling involving tryptophan metabolism and potential microglial inflammation characterize Primary Open Angle**

Sujith Kumar Pulukool<sup>1</sup>, Sai Krishna Srimadh Bhagavatham<sup>1</sup>, Vishnu Kannan<sup>1,2</sup>, Piruthivi Sukumar<sup>3</sup> Rajesh Babu Dandamudi<sup>4,5</sup>, Shamika Ghaisas<sup>6</sup>, Haripriya Kunchala<sup>6</sup>, Darshan Saieesh<sup>1</sup>, Ashwin Ashok Naik<sup>1</sup>, Ashish Pargaonkar<sup>7</sup>, Anuj Sharma<sup>6\*</sup>, Venketesh Sivaramakrishnan<sup>1\*</sup>

<sup>1</sup> Disease Biology Lab, SSSIHL-Agilent Center for Excellence in Multiomics and Cell Sciences, Dept. of Biosciences, Sri Sathya Sai Institute of Higher Learning, Prasanthi Nilayam, Andhra Pradesh, India, 515

<sup>2</sup> Current address: Dept. of Botany/Biotechnology, CMS College, Kottayam. India 686 001.

<sup>3</sup> Leeds institute of Cardiovascular and Metabolic medicine, School of medicine, University of Leeds, Leeds,

<sup>4</sup> Previous Address: SSSIHL-Agilent Center for Excellence in Multiomics and Cell Science, Dept. of Chemistry, Sri Sathya Sai Institute of Higher Learning, Prasanthi Nilayam, Andhra Pradesh, India, 515 134.

<sup>5</sup> Current address: Phenomenex India, Hyderabad, Telangana, India- 500 084.

<sup>6</sup> Department of Ophthalmology, Sri Sathya Sai Institute of Higher Medical Sciences, Prasanthi Gram, Andhra Pradesh, India, 515 134.

<sup>7</sup> Application Division, Agilent Technologies Ltd., Bengaluru, India.

\*To whom correspondence has to be send: Dr.Venketesh Sivaramakrishnan

[svenketesh@sssihl.edu.in](mailto:svenketesh@sssihl.edu.in), [s.venketesh@gmail.com](mailto:s.venketesh@gmail.com) and

[Dr. Anuj Sharma anujsharma85@gmail.com](mailto:Dr.Anuj.Sharma.anujsharma85@gmail.com)

Venketesh Sivaramakrishnan ORCID- 0000-0003-3094-5905

| <b>Transcriptomics -GSEid-27276 Kegg- Significant pathways</b> |
|----------------------------------------------------------------|
| Alcoholism                                                     |
| Allograft rejection                                            |
| Amoebiasis                                                     |
| Antigen processing and presentation                            |
| Arginine and proline metabolism                                |
| Asthma                                                         |
| Autoimmune thyroid disease                                     |
| Cell adhesion molecules (CAMs)                                 |
| Chagas disease (American trypanosomiasis)                      |
| Complement and coagulation cascades                            |
| Fluid shear stress and atherosclerosis                         |
| Focal adhesion                                                 |
| glutathione metabolism                                         |
| Glycine, serine and threonine metabolism                       |
| Glycosaminoglycan biosynthesis                                 |
| Graft-versus-host disease                                      |
| Hematopoietic cell lineage                                     |
| Herpes simplex infection                                       |
| Intestinal immune network for IgA production                   |
| Leishmaniasis                                                  |
| Leukocyte transendothelial migration                           |
| Malaria                                                        |
| Mineral absorption                                             |
| Osteoclast differentiation                                     |
| Pentose phosphate pathway                                      |
| Pertussis                                                      |
| Phagosome                                                      |
| Protein digestion and absorption                               |
| Proximal tubule bicarbonate reclamation                        |
| Renin secretion                                                |
| Rheumatoid arthritis                                           |
| Small cell lung cancer                                         |
| Staphylococcus aureus infection                                |
| Systemic lupus erythematosus                                   |
| Toxoplasmosis                                                  |
| Tuberculosis                                                   |
| Type I diabetes mellitus                                       |
| Tyrosine metabolism                                            |
| Vasopressin-regulated water reabsorption                       |
| Viral carcinogenesis                                           |
| Viral myocarditis                                              |
| AGE-RAGE signaling pathway in diabetic complications           |

### Transcriptomics -GSEid-4316 Kegg- Significant pathways

|                                                      |                                                  |
|------------------------------------------------------|--------------------------------------------------|
| Acute myeloid leukemia                               | GnRH signaling pathway                           |
| Adherens junction                                    | Hematopoietic cell lineage                       |
| Adrenergic signaling in cardiomyocytes               | Inflammatory mediator regulation of TRP channels |
| AGE-RAGE signaling pathway in diabetic complications | Malaria                                          |
| Aldosterone synthesis and secretion                  | Mannose type O-glycan biosynthesis               |
| Amoebiasis                                           | Melanoma                                         |
| Axon guidance                                        | Ovarian steroidogenesis                          |
| B cell receptor signaling pathway                    | Pancreatic secretion                             |
| Bile secretion                                       | Pathways in cancer                               |
| Biosynthesis of unsaturated fatty acids              | Phospholipase D signaling pathway                |
| Breast cancer                                        | Platelet activation                              |
| Butanoate metabolism                                 | Progesterone-mediated oocyte maturation          |
| Calcium signaling pathway                            | Prolactin signaling pathway                      |
| cAMP signaling pathway                               | Proteoglycans in cancer                          |
| cGMP-PKG signaling pathway                           | Rap1 signaling pathway                           |
| Chronic myeloid leukemia                             | Regulation of actin cytoskeleton                 |
| Dilated cardiomyopathy                               | Regulation of lipolysis in adipocytes            |
| Endocytosis                                          | Renal cell carcinoma                             |
| ErbB signaling pathway                               | Renin secretion                                  |
| Estrogen signaling pathway                           | T cell receptor signaling pathway                |
| Fc epsilon RI signaling pathway                      | Thyroid cancer                                   |
| Focal adhesion                                       | Thyroid hormone synthesis                        |
| FoxO signaling pathway                               | Type I diabetes mellitus                         |
| Gastric acid secretion                               | Type II diabetes mellitus                        |
| Glutamatergic synapse                                | Vasopressin-regulated water reabsorption         |

| <b>METABOLITES</b>                                            | <b>HMDB</b> | <b>PATHWAYS</b>                                     |
|---------------------------------------------------------------|-------------|-----------------------------------------------------|
| Nicotinamide                                                  | HMDB0001406 | Arginine and proline metabolism                     |
| Arginine                                                      | HMDB0000517 | Cysteine and methionine metabolism                  |
| Glyceraldehyde                                                | HMDB0001051 | Aminoacyl-tRNA biosynthesis                         |
| N-acetyl-L-leucine                                            | HMDB0011756 | Phenylalanine, tyrosine and tryptophan biosynthesis |
| Galactose                                                     | HMDB0000143 | Glycine, serine and threonine metabolism            |
| Hypoxanthine                                                  | HMDB0000157 | Pyrimidine metabolism                               |
| 1-methyl-6,7-dihydroxy-<br>1,2,3,4-<br>tetrahydroisoquinoline | HMDB0005199 | Ubiquinone and other terpenoid-quinone biosynthesis |
| Glyoxylic acid                                                | HMDB0000119 | Phenylalanine metabolism                            |
| Arabinose                                                     | HMDB0000646 | Arginine biosynthesis                               |
| Xanthine                                                      | HMDB0000292 | Nicotinate and nicotinamide metabolism              |
| 3-hydroxybenzaldehyde                                         | HMDB0011718 | Histidine metabolism                                |
| Tyrosine                                                      | HMDB0000158 | Pantothenate and CoA biosynthesis                   |
| Indole-3-acetate                                              | HMDB0000197 | Purine metabolism                                   |
| Urocanate                                                     | HMDB0000301 | beta-Alanine metabolism                             |
| Uracil                                                        | HMDB0000300 | Lysine degradation                                  |
| N-acetylputrescine                                            | HMDB0002064 | Galactose metabolism                                |
| 3-hydroxy phenylacetate                                       | HMDB0000440 | Glyoxylate and dicarboxylate metabolism             |
| Glycolate                                                     | HMDB0000115 | Amino sugar and nucleotide sugar metabolism         |
| Methionine                                                    | HMDB0000696 | Fatty acid degradation                              |
| Alpha-aminoadipate                                            | HMDB0000510 | Tryptophan metabolism                               |
| Cystathionine                                                 | HMDB0000099 | Tyrosine metabolism                                 |
| Cortisone                                                     | HMDB0002802 | Steroid hormone biosynthesis                        |
| Uridine                                                       | HMDB0000296 |                                                     |
| cis-4-hydroxy-d-proline                                       | HMDB0060460 |                                                     |
| 4-hydroxy-l-proline                                           | HMDB0006055 |                                                     |
| Cystine                                                       | HMDB0000192 |                                                     |
| 1-oleoyl-rac-glycerol                                         | HMDB0011567 |                                                     |
|                                                               |             |                                                     |
|                                                               |             |                                                     |

Nzoughe, J. K. *et al.* A data mining metabolomics exploration of glaucoma. *Metabolites* **10**, (2020).

| <b>METABOLITES</b>    | <b>HMDB</b> | <b>PATHWAYS</b>                             |
|-----------------------|-------------|---------------------------------------------|
| Methylmalonic acid    | HMDB0000202 | Galactose metabolism                        |
| Spermidine            | HMDB0001257 | Amino sugar and nucleotide sugar metabolism |
| N-cyclohexylformamide | HMDB0031314 | Biotin metabolism                           |
| Sorbitol              | HMDB0000247 | Pentose and glucuronate interconversions    |
| Biotin                | HMDB0000030 | Starch and sucrose metabolism               |
| Pelargonic acid       | HMDB0000847 | Fructose and mannose metabolism             |
| Galactose             | HMDB0000143 | beta-Alanine metabolism                     |
| Mannose               | HMDB0000169 | Glycolysis / Gluconeogenesis                |
| D-erythrulose         | HMDB0000349 | Glutathione metabolism                      |
| Dehydroascorbic Acid  | HMDB0001264 | Arginine and proline metabolism             |
| Ribitol               | HMDB0000508 | Valine, leucine and isoleucine degradation  |
| Glucose-1-phosphate   | HMDB0001586 |                                             |
|                       |             |                                             |
|                       |             |                                             |

Pan, C. W. *et al.* Differential metabolic markers associated with primary open-angle glaucoma and cataract in human aqueous humor. *BMC Ophthalmol.* **20**, 1–8 (2020).

| METABOLITES       | HMDB        | PATHWAYS                                    |
|-------------------|-------------|---------------------------------------------|
| Alanine           | HMDB0000161 | Alanine, aspartate and glutamate metabolism |
| lysine            | HMDB0000182 | Aminoacyl-tRNA biosynthesis                 |
| Leucine           | HMDB0000687 | Arginine biosynthesis                       |
| Nacetylglutamate  | HMDB0001138 | Butanoate metabolism                        |
| Acetate           | HMDB0000042 | D-Glutamine and D-glutamate metabolism      |
| glutamine         | HMDB0000641 | Glyoxylate and dicarboxylate metabolism     |
| glutamate         | HMDB0000148 | Citrate cycle (TCA cycle)                   |
| valine            | HMDB0000883 | Nitrogen metabolism                         |
| b-hydroxybutyrate | HMDB0000357 | Glycolysis / Gluconeogenesis                |
| succinate         | HMDB0000254 | Valine, leucine and isoleucine biosynthesis |
| a-ketoglutarate   | HMDB0000208 | Arginine and proline metabolism             |
| citrate           | HMDB0000094 | Pyruvate metabolism                         |
| creatine          | HMDB0000064 | Glycine, serine and threonine metabolism    |
| phospho-creatine  | HMDB0001511 | Synthesis and degradation of ketone bodies  |
| glucose           | HMDB0000122 | Valine, leucine and isoleucine degradation  |
| taurine           | HMDB0000251 | Taurine and hypotaurine metabolism          |
| betaine           | HMDB0000043 | Biotin metabolism                           |
| lactate           | HMDB0000190 | Histidine metabolism                        |
|                   |             | Pantothenate and CoA biosynthesis           |
|                   |             | Selenocompound metabolism                   |
|                   |             | Propanoate metabolism                       |
|                   |             | Lysine degradation                          |
|                   |             | Glutathione metabolism                      |
|                   |             | Porphyrin and chlorophyll metabolism        |
|                   |             | Pyrimidine metabolism                       |
|                   |             | Primary bile acid biosynthesis              |
|                   |             | Purine metabolism                           |
|                   |             |                                             |
|                   |             |                                             |

Barbosa Breda, J. *et al.* Metabolomic profiling of aqueous humor from glaucoma patients - The metabolomics in surgical ophthalmological patients (MISO) study. *Exp. Eye Res.* **201**, 108268 (2020).

| Gene names for proteins |       | Significant Pathways- Kegg          |
|-------------------------|-------|-------------------------------------|
| AL3A1                   | APLP2 | Pentose phosphate pathway           |
| VILL                    | IGHG3 | Glycolysis / Gluconeogenesis        |
| PRDX1                   | PRDX2 | Phenylalanine metabolism            |
| CREG1                   | TIMP2 | Cholesterol metabolism              |
| TGFB2                   | FA5   | Amoebiasis                          |
| ACTA                    | SEM4B | HIF-1 signaling pathway             |
| HSPB1                   | SCG3  | Glycosaminoglycan degradation       |
| TKT                     | NRCAM | Vitamin digestion and absorption    |
| PGK1                    | GNS   | Pertussis                           |
| ENOA                    | A2AP  | Complement and coagulation cascades |
| CRBS                    | CO8B  |                                     |
| LDHA                    | THBG  |                                     |
| GSTP1                   | PGRP2 |                                     |
| B3AT                    | FCGBP |                                     |
| PEBP1                   | VTNC  |                                     |
| MIF                     | APOA4 |                                     |
| TPIS                    | GELS  |                                     |
| NEUS                    | THRB  |                                     |
| AMD                     | FETUA |                                     |
| KPYM                    | VTDB  |                                     |
| NTRI                    | RTBDN |                                     |
| HS71L                   | AACT  |                                     |
| HPTR                    | ANGT  |                                     |
| CRYAA                   | ITIH1 |                                     |
| RL40                    | CO9   |                                     |
| CATA                    | ITIH4 |                                     |
| HV305                   | K1C16 |                                     |
| HBG1                    | APOD  |                                     |
| ARG11                   | NGAL  |                                     |
| PRDX6                   | ITIH2 |                                     |
| ALDOA                   | B2MG  |                                     |
| IGLL5                   | CD14  |                                     |
| PTN                     | CHIT1 |                                     |
| SODC                    | FGFP2 |                                     |
| FABP5                   | C1QB  |                                     |
| TICN1                   | APOC1 |                                     |
| TICN2                   | MMP2  |                                     |
| TPP1                    | C163A |                                     |
| ANK1                    | MGP   |                                     |
| AL1A1                   | CBG   |                                     |
| IMPG2                   | AMBP  |                                     |
| CAH1                    | VSIG4 |                                     |
| K2C5                    | LFTY1 |                                     |
| ACTBL                   |       |                                     |

| Gene names for proteins |             | Significant Pathways- Kegg                                 |
|-------------------------|-------------|------------------------------------------------------------|
| IGKC                    | FCGBP       | Citrate cycle (TCA cycle)                                  |
| ITIH4                   | NKAIN2      | Cholesterol metabolism                                     |
| APOC3                   | SLC35C2     | Glycosylphosphatidylinositol (GPI)-<br>anchor biosynthesis |
| IDH3A                   | TSPAN14     | Complement and coagulation<br>cascades                     |
| LOC105369216            | FAM171B     | Propanoate metabolism                                      |
| SERPINF2                | FETUB       | Vasopressin-regulated water<br>reabsorption                |
| NPC2                    | LRP5        | Valine, leucine and isoleucine<br>degradation              |
| SUCLG2                  | FGB         | Bile secretion                                             |
| KIAA0100                | HSD17B10    | PPAR signaling pathway                                     |
| CNOT4                   | PIGC        | Inositol phosphate metabolism                              |
| AQP4                    | CNIH1       |                                                            |
| COL18A1                 | TOR3A       |                                                            |
| NWD1                    | MED23       |                                                            |
| TMEM120B                | SDHAF2      |                                                            |
| LRRC34                  | COMMD3-BMI1 |                                                            |
| V-kappa-3               | INPP1       |                                                            |



| <b>Protein description</b>    | <b>Significant Pathways- Kegg</b> |
|-------------------------------|-----------------------------------|
| Prostaglandin H2 D- isomerase | Arachidonic acid metabolism       |
| caspase 14 precursor          | Thyroid hormone synthesis         |
| transthyretin                 |                                   |
| Albumin precursor             |                                   |
| Cystatin C                    |                                   |
| transferrin                   |                                   |

| <b>Gene names for proteins</b> | <b>Significant Pathways- Kegg</b>        |
|--------------------------------|------------------------------------------|
| SORD                           | Pentose phosphate pathway                |
| BFSP1                          | Galactose metabolism                     |
| BFSP2                          | Glycolysis / Gluconeogenesis             |
| PDGFA                          | Fructose and mannose metabolism          |
| PDGFB                          | Pentose and glucuronate interconversions |
| PPBP                           | Melanoma                                 |
| AKR1A1                         | Glioma                                   |
| CTSA                           | Renin-angiotensin system                 |
| MIP                            | Gap junction                             |
| PFKL                           | Prostate cancer                          |
| PGM1                           |                                          |
| RLBP1                          |                                          |
| TRH                            |                                          |
| HSPB1                          |                                          |
| WFDC1                          |                                          |
