# Supplementary material for: Elevated dimethylarginine, ATP, cytokines, metabolic remodeling involving tryptophan metabolism and potential microglial inflammation characterize primary open angle glaucoma
Source: PubMed Central journal article supplement (PMC8105335; doi:10.1038/s41598-021-89137-z), 2021-05-07
Supplement: 41598_2021_89137_MOESM7_ESM.pdf [file 41598_2021_89137_MOESM7_ESM.pdf]

**Supplementary Table S2:** Commonality or overlapping pathways of proteomics (Literature), metabolomics (Literature) and transcriptomics (GEO data sets) with POAG patient pathway

**Elevated Dimethylarginine, ATP, cytokines, metabolic remodeling involving tryptophan metabolism and potential microglial inflammation characterize Primary Open Angle Glaucoma**

Sujith Kumar Pulukool<sup>1</sup>, Sai Krishna Srimadh Bhagavatham<sup>1</sup>, Vishnu Kannan<sup>1,2</sup>, Piruthivi Sukumar<sup>3</sup>, Rajesh Babu Dandamudi<sup>4,5</sup>, Shamika Ghaisas<sup>6</sup>, Haripriya Kunchala<sup>6</sup>, Darshan Saieesh<sup>1</sup>, Ashwin Ashok Naik<sup>1</sup>, Ashish Pargaonkar<sup>7</sup>, Anuj Sharma<sup>6\*</sup>, Venketesh Sivaramakrishnan<sup>1\*</sup>

<sup>1</sup> Disease Biology Lab, SSSIHL-Agilent Center for Excellence in Multiomics and Cell Sciences, Dept. of Biosciences, Sri Sathya Sai Institute of Higher Learning, Prasanthi Nilayam, Andhra Pradesh, India, 515 134.

<sup>2</sup> Current address: Dept. of Botany/Biotechnology, CMS College, Kottayam. India 686 001.

<sup>3</sup> Leeds institute of Cardiovascular and Metabolic medicine, School of medicine, University of Leeds, Leeds, UK

<sup>4</sup> Previous Address: SSSIHL-Agilent Center for Excellence in Multiomics and Cell Science, Dept. of Chemistry, Sri Sathya Sai Institute of Higher Learning, Prasanthi Nilayam, Andhra Pradesh, India, 515 134.

<sup>5</sup> Current address: Phenomenex India, Hyderabad, Telangana, India- 500 084.

<sup>6</sup> Department of Ophthalmology, Sri Sathya Sai Institute of Higher Medical Sciences, Prasanthi Gram, Andhra Pradesh, India, 515 134.

<sup>7</sup> Application Division, Agilent Technologies Ltd., Bengaluru, India.

\*To whom correspondence has to be send: Dr.Venketesh Sivaramakrishnan

[svenketesh@sssihl.edu.in](mailto:svenketesh@sssihl.edu.in), [s.venketesh@gmail.com](mailto:s.venketesh@gmail.com), and

Dr. Anuj Sharma [anujsharma85@gmail.com](mailto:anujsharma85@gmail.com)

Venketesh Sivaramakrishnan ORCID- 0000-0003-3094-5905

**Supplementary Table S2:** Commonality or overlapping pathways of proteomics (Literature), metabolomics (Literature) and transcriptomics (GEO data sets) with POAG patient pathway

| <b>Transcriptomics GSE 27276 Vs Metabolomic (Present study)</b>                         | <b>Pathway Source</b>                  |
|-----------------------------------------------------------------------------------------|----------------------------------------|
| Arginine and proline metabolism                                                         | KEGG_17.03.2017                        |
| Glutathione metabolism                                                                  | KEGG_17.03.2017                        |
| Glycine, serine and threonine metabolism                                                | KEGG_17.03.2017                        |
| <b>Transcriptomics GSE 4316 Vs Metabolomic (Present study)</b>                          |                                        |
| Butanoate metabolism                                                                    | KEGG_17.03.2017                        |
| <b>Transcriptomics (27276+4316-Kegg,Wiki, Reactome) Vs Metabolomics (Present Study)</b> |                                        |
| Glycine, serine and threonine metabolism                                                | KEGG_17.03.2017- GSE27276              |
| Arginine and Proline metabolism                                                         | KEGG_17.03.2017- GSE27276              |
| Glutathione metabolism                                                                  | KEGG_17.03.2017- GSE27276              |
| Sphingolipid metabolism                                                                 | REACTOME_Pathways_09.11.2016- GSE27276 |
| Butanoate metabolism                                                                    | KEGG_17.03.2017- GSE4316               |
| Nicotinate and nicotinamide metabolism                                                  | REACTOME_Pathways_09.11.2016- GSE4316  |
| Alanine and Aspartate metabolism                                                        | WikiPathways_08.11.2016 –GSE4316       |
| <b>Proteomics (Literature) Vs Metabolomic (Present study)</b>                           |                                        |
| Valine , leucine and isoleucine degradation                                             | KEGG Pathways                          |
| <b>Metabolomics (Literature) Vs Metabolomic (Present study)</b>                         |                                        |
| Alanine, aspartate and glutamate metabolism                                             | KEGG Pathways                          |
| Aminoacyl- tRNA biosynthesis                                                            | KEGG Pathways                          |
| Arginine and proline metabolism                                                         | KEGG Pathways                          |
| Arginine biosynthesis                                                                   | KEGG Pathways                          |
| Biotin metabolism                                                                       | KEGG Pathways                          |
| Butanoate metabolism                                                                    | KEGG Pathways                          |
| Cysteine and methionine metabolism                                                      | KEGG Pathways                          |
| D-Glutamine and D-glutamate metabolism                                                  | KEGG Pathways                          |
| Glutathione metabolism                                                                  | KEGG Pathways                          |
| Glycine, serine and threonine metabolism                                                | KEGG Pathways                          |
| Glyoxylate and dicarboxylate metabolism                                                 | KEGG Pathways                          |
| Histidine metabolism                                                                    | KEGG Pathways                          |
| Lysine degradation                                                                      | KEGG Pathways                          |
| Nicotinate and nicotinamide metabolism                                                  | KEGG Pathways                          |
| Nitrogen metabolism                                                                     | KEGG Pathways                          |
| Porphyrin and chlorophyll metabolism                                                    | KEGG Pathways                          |
| Purine metabolism                                                                       | KEGG Pathways                          |
| pyrimidine metabolism                                                                   | KEGG Pathways                          |
| Pyruvate metabolism                                                                     | KEGG Pathways                          |
| Tryptophan metabolism                                                                   | KEGG Pathways                          |
| Valine, leucine and isoleucine degradation                                              | KEGG Pathways                          |
| <b>Transcriptomics (27276+4316) Vs Metabolomics (Literature+ Present study)</b>         |                                        |
| Arginine and proline metabolism                                                         | KEGG_17.03.2017                        |
| Glycine, serine and threonine metabolism                                                | KEGG_17.03.2017                        |
| Tyrosine metabolism                                                                     | KEGG_17.03.2017                        |
| Butanoate metabolism                                                                    | KEGG_17.03.2017                        |
| <b>Transcriptomics (27276+4316) Vs Proteomics (Literature)</b>                          |                                        |
| Amoebiasis                                                                              | KEGG_17.03.2017                        |
| Complement and coagulation cascades                                                     | KEGG_17.03.2017                        |
| Mineral absorption                                                                      | KEGG_17.03.2017                        |
| Pentose phosphate pathway                                                               | KEGG_17.03.2017                        |
| Pertussis                                                                               | KEGG_17.03.2017                        |

**Supplementary Table S2:** Commonality or overlapping pathways of proteomics (Literature), metabolomics (Literature) and transcriptomics (GEO data sets) with POAG patient pathway

|                                                                           |                              |                |
|---------------------------------------------------------------------------|------------------------------|----------------|
| Vasopressin –regulated water absorption                                   | KEGG_17.03.2017              |                |
| Bile secretion                                                            | KEGG_17.03.2017              |                |
| Melanoma                                                                  | KEGG_17.03.2017              |                |
| Thyroid hormone synthesis                                                 | KEGG_17.03.2017              |                |
| <b>Proteomics (Literature) Vs Metabolomics (Literature+Present study)</b> |                              |                |
| Glycolysis/Gluconeogenesis                                                | KEGG Pathways                |                |
| Phenylalanine metabolism                                                  | KEGG Pathways                |                |
| Citrate cycle (TCA cycle)                                                 | KEGG Pathways                |                |
| Propanoate metabolism                                                     | KEGG Pathways                |                |
| Valine , leucine and isoleucine degradation                               | KEGG Pathways                |                |
| Galactose metabolism                                                      | KEGG Pathways                |                |
| Fructose and Mannose metabolism                                           | KEGG Pathways                |                |
| Pentose and glucuronate interconversion                                   | KEGG Pathways                |                |
| <b>Transcriptomics (27276+4316) Vs N9 ATP (positive + negative)</b>       |                              |                |
| Arginine and proline metabolism                                           | KEGG_17.03.2017              |                |
| Glycine, serine and threonine metabolism                                  | KEGG_17.03.2017              |                |
| Pentose Phosphate Pathway                                                 | KEGG_17.03.2017              |                |
| Biosynthesis of unsaturated fatty acids                                   | KEGG_17.03.2017              |                |
| Butanoate metabolism                                                      | KEGG_17.03.2017              |                |
| <b>Proteomics (Literature) vs N9 ATP (positive + negative)</b>            |                              |                |
| Pentose Phosphate Pathway                                                 | KEGG Pathways                |                |
| Glycolysis/Gluconeogenesis                                                | KEGG Pathways                |                |
| Phenylalanine metabolism                                                  | KEGG Pathways                |                |
| Citrate cycle (TCA cycle)                                                 | KEGG Pathways                |                |
| Propanoate metabolism                                                     | KEGG Pathways                |                |
| Valine , leucine and isoleucine degradation                               | KEGG Pathways                |                |
| Inositol phosphate metabolism                                             | KEGG Pathways                |                |
| <b>GSE27276</b>                                                           |                              |                |
| <b>Metabolic Pathways</b>                                                 | <b>Pathway Source</b>        | <b>P value</b> |
| Metabolism of Angiotensinogen to Angiotensins                             | REACTOME_Pathways_09.11.2016 | 0.017          |
| Metabolism                                                                | REACTOME_Pathways_09.11.2016 | 0.034          |
| Glycosphingolipid metabolism                                              | REACTOME_Pathways_09.11.2016 | 0.034          |
| Sphingolipid metabolism                                                   | REACTOME_Pathways_09.11.2016 | 0.034          |
| Metabolism of lipids and lipoproteins                                     | REACTOME_Pathways_09.11.2016 | 0.034          |
| Glycosaminoglycan metabolism                                              | REACTOME_Pathways_09.11.2016 | 0.0035         |
| Hyaluronan metabolism                                                     | REACTOME_Pathways_09.11.2016 | 0.0035         |
| Glycosaminoglycan metabolism                                              | REACTOME_Pathways_09.11.2016 | 0.0035         |
| Heparan sulfate/heparin (HS-GAG) metabolism                               | REACTOME_Pathways_09.11.2016 | 0.002          |
| Chondroitin sulfate/dermatan sulfate metabolism                           | REACTOME_Pathways_09.11.2016 | 0.002          |
| Metabolism of vitamins and cofactors                                      | REACTOME_Pathways_09.11.2016 | 0.002          |
| Diseases associated with glycosaminoglycan metabolism                     | REACTOME_Pathways_09.11.2016 | 0.002          |
| Metabolism of fat-soluble vitamins                                        | REACTOME_Pathways_09.11.2016 | 0.002          |
| Retinoid metabolism and transport                                         | REACTOME_Pathways_09.11.2016 | 0.002          |
| Cholesterol biosynthesis                                                  | REACTOME_Pathways_09.11.2016 | 0.048          |
| Cholesterol biosynthesis via desmosterol                                  | REACTOME_Pathways_09.11.2016 | 0.048          |
| Cholesterol biosynthesis via lathosterol                                  | REACTOME_Pathways_09.11.2016 | 0.048          |
| Glycine, serine and threonine metabolism                                  | KEGG_17.03.2017              | 0.033          |
| Arginine and proline metabolism                                           | KEGG_17.03.2017              | 0.031          |
| Tyrosine metabolism                                                       | KEGG_17.03.2017              | 0.018          |
| Glutathione metabolism                                                    | KEGG_17.03.2017              | 0.016          |

**Supplementary Table S2:** Commonality or overlapping pathways of proteomics (Literature), metabolomics (Literature) and transcriptomics (GEO data sets) with POAG patient pathway

| <b>Cytokine Pathways</b>                                             | <b>Pathway Source</b>         |             |
|----------------------------------------------------------------------|-------------------------------|-------------|
| Neutrophil degranulation                                             | REACTOME_Pathways_09.11.2016  | 0.00005     |
| Interleukin-7 signalling                                             | REACTOME_Pathways_09.11.2016  | 0.007       |
| Costimulation by the CD28 family                                     | REACTOME_Pathways_09.11.2016  | 0.007       |
| Interferon gamma signaling                                           | REACTOME_Pathways_09.11.2016  | 0.0031      |
| <b>GSE4316</b>                                                       |                               |             |
| <b>Metabolic Pathways</b>                                            | <b>Pathway Source</b>         |             |
| Bile acid and bile salt metabolism                                   | REACTOME_Pathways_09.11.2016  | 0.014       |
| alpha-linolenic acid (ALA) metabolism                                | REACTOME_Pathways_09.11.2016  | 0.014       |
| PI Metabolism                                                        | REACTOME_Pathways_09.11.2016  | 0.018       |
| Peptide hormone metabolism                                           | REACTOME_Pathways_09.11.2016  | 0.0021      |
| Nicotinate metabolism                                                | REACTOME_Pathways_09.11.2016  | 0.049       |
| Metabolism of steroid hormones                                       | REACTOME_Pathways_09.11.2016  | 0.042       |
| Vitamin D (calciferol) metabolism                                    | REACTOME_Pathways_09.11.2016  | 0.0022      |
| alpha-linolenic (omega3) and linoleic (omega6) acid metabolism       | REACTOME_Pathways_09.11.2016  | 0.014       |
| Glucagon signalling in metabolic regulation                          | REACTOME_Pathways_09.11.2016  | 0.008       |
| Phospholipid metabolism                                              | REACTOME_Pathways_09.11.2016  | 0.018       |
| Synthesis of bile acids and bile salts                               | REACTOME_Pathways_09.11.2016  | 0.014       |
| Synthesis of bile acids and bile salts via 7alpha-hydroxycholesterol | REACTOME_Pathways_09.11.2016  | 0.014       |
| Synthesis of bile acids and bile salts via 27-hydroxycholesterol     | REACTOME_Pathways_09.11.2016  | 0.033       |
| Butanoate metabolism                                                 | KEGG_17.03.2017               | 0.025       |
| Vitamin A and Carotenoid Metabolism                                  | WikiPathways_08.11.2016       | 0.023       |
| Nuclear Receptors in Lipid Metabolism and Toxicity                   | WikiPathways_08.11.2016       | 0.000056    |
| Alanine and aspartate metabolism                                     | WikiPathways_08.11.2016       | 0.039       |
| Valproic acid pathway                                                | WikiPathways_08.11.2016       | 0.049       |
| <b>Cytokine Pathways</b>                                             | <b>Pathway Source</b>         |             |
| Inflammatory mediator regulation of TRP channels                     | KEGG_17.03.2017               | 0.00073     |
| TGF-beta Signaling Pathway                                           | WikiPathways_08.11.2016       | 0.033       |
| <b>GSE27276</b>                                                      |                               |             |
| Chagas Disease (American trypanosomiasis) – TNFRSF1A, TGFβ3          | KEGG_17.03.2017               | 0.033       |
| Osteoclast differentiation- TNFRSF1A                                 | KEGG_17.03.2017               | 0.015       |
| Fluid shear stress and atherosclerosis - TNFRSF1A                    | KEGG_17.03.2017               | 0.019       |
| Toxoplasmosis- TNFRSF1A, TGFβ3                                       | KEGG_17.03.2017               | 0.00047     |
| Tuberculosis- TNFRSF1A, TGFβ3                                        | KEGG_17.03.2017               | 0.017       |
| herplex simplex infection- TNFRSF1A                                  | KEGG_17.03.2017               | 0.027       |
| Leishmaniasis-TGFβ3                                                  | KEGG_17.03.2017               | 0.0045      |
| Rheumatoid Arthritis- TGFβ3                                          | KEGG_17.03.2017               | 0.024       |
| inflammatory response pathway- TNFRSF1A                              | WikiPathways_08.11.2016       | 0.018       |
| NCAM1 interactions- TGFβ3                                            | REACTOME _pathways_09.11.2016 | 0.000067    |
| ECM proteoglycans- TGFβ3                                             | REACTOME _pathways_09.11.2016 | 0.000067    |
| Integrin cell surface interactions- TGFβ3                            | REACTOME _pathways_09.11.2016 | 0.000067    |
| Assembly of collagen fibrils and other multimeric structures- TGFβ3  | REACTOME _pathways_09.11.2016 | 0.000067    |
| collagen degradation - TGFβ3                                         | REACTOME _pathways_09.11.2016 | 0.000067    |
| Extracellular matrix organization- TGFβ3                             | REACTOME _pathways_09.11.2016 | 0.000000026 |
| collagen formation- TGFβ3                                            | REACTOME _pathways_09.11.2016 | 0.000067    |
| collagen biosynthesis and modifying enzymes- TGFβ3                   | REACTOME _pathways_09.11.2016 | 0.000067    |
| <b>GSE4316</b>                                                       |                               |             |
| Fc epsilon RI signaling pathway-TNF                                  | KEGG_17.03.2017               | 0.0078      |
| Proteoglycans in cancer-TNF                                          | KEGG_17.03.2017               | 0.0041      |
| T cell receptor signaling pathway-TNF                                | KEGG_17.03.2017               | 0.0052      |

**Supplementary Table S2:** Commonality or overlapping pathways of proteomics (Literature), metabolomics (Literature) and transcriptomics (GEO data sets) with POAG patient pathway

|                                                                    |                               |                |
|--------------------------------------------------------------------|-------------------------------|----------------|
| Chronic myeloid leukemia-TGFβ3                                     | KEGG_17.03.2017               | 0.039          |
| Endocytosis- TGFβ3                                                 | KEGG_17.03.2017               | 0.046          |
| FoxO signaling pathway- TGFβ3                                      | KEGG_17.03.2017               | 0.041          |
| pathways in cancer- TGFβ3                                          | KEGG_17.03.2017               | 0.000049       |
| renal cell carcinoma- TGFβ3                                        | KEGG_17.03.2017               | 0.0056         |
| Extracellular vesicle-mediated signaling in recipient cells- TGFβ3 | WikiPathways_08.11.2016       | 0.044          |
| Differentiation pathway- TGFβ3                                     | WikiPathways_08.11.2016       | 0.0035         |
| Type II diabetes mellitus-TNF                                      | WikiPathways_08.11.2016       | 0.012          |
| Monoamine Transport-TNF                                            | WikiPathways_08.11.2016       | 0.016          |
| <b>GSE27276 &amp; GSE4316</b>                                      |                               |                |
| Amoebiasis-TGFβ3, TNF                                              | KEGG_17.03.2017               | 0.00067, 0.048 |
| Malaria-TGFβ3, TNF                                                 | KEGG_17.03.2017               | 0.0091,0.028   |
| Age rage signaling pathway in diabetic complication- TGFβ3         | KEGG_17.03.2017               | 0.0089,0.0088  |
| Hematopoietic cell lineage-TNF                                     | KEGG_17.03.2017               | 0.0022,0.0079  |
| Type I diabetes mellitus-TNF                                       | KEGG_17.03.2017               | 0.014,0.028    |
| Elastic fibre formation –TGFβ3                                     | REACTOME _pathways_09.11.2016 | 0.00031,0.018  |
| Molecules associated with elastic fibres-TGFβ3                     | REACTOME _pathways_09.11.2016 | 0.00031,0.018  |
