# Supplementary material for: Elevated dimethylarginine, ATP, cytokines, metabolic remodeling involving tryptophan metabolism and potential microglial inflammation characterize primary open angle glaucoma
Source: PubMed Central journal article supplement (PMC8105335; doi:10.1038/s41598-021-89137-z), 2021-05-07
Supplement: 41598_2021_89137_MOESM8_ESM.pdf [file 41598_2021_89137_MOESM8_ESM.pdf]

**Supplementary Table S3:** List of multiple reaction monitoring (MRM) for all the identified metabolites and LC-MS parameters in positive mode

**Elevated Dimethylarginine, ATP, cytokines, metabolic remodeling involving tryptophan metabolism and potential microglial inflammation characterize Primary Open Angle Glaucoma**

Sujith Kumar Pulukool<sup>1</sup>, Sai Krishna Srimadh Bhagavatham<sup>1</sup>, Vishnu Kannan<sup>1,2</sup>, Piruthivi Sukumar<sup>3</sup>, Rajesh Babu Dandamudi<sup>4,5</sup>, Shamika Ghaisas<sup>6</sup>, Haripriya Kunchala<sup>6</sup>, Darshan Saieesh<sup>1</sup>, Ashwin Ashok Naik<sup>1</sup>, Ashish Pargaonkar<sup>7</sup>, Anuj Sharma<sup>6\*</sup>, Venketesh Sivaramakrishnan<sup>1\*</sup>

<sup>1</sup>Disease Biology Lab, SSSIHL-Agilent Center for Excellence in Multiomics and Cell Sciences, Dept. of Biosciences, Sri Sathya Sai Institute of Higher Learning, Prasanthi Nilayam, Andhra Pradesh, India, 515 134.

<sup>2</sup> Current address: Dept. of Botany/Biotechnology, CMS College, Kottayam. India 686 001.

<sup>3</sup>Leeds institute of Cardiovascular and Metabolic medicine, School of medicine, University of Leeds, Leeds, UK

<sup>4</sup> Previous Address: SSSIHL-Agilent Center for Excellence in Multiomics and Cell Science, Dept. of Chemistry, Sri Sathya Sai Institute of Higher Learning, Prasanthi Nilayam, Andhra Pradesh, India, 515 134.

<sup>5</sup> Current address: Phenomenex India, Hyderabad, Telangana, India- 500 084.

<sup>6</sup>Department of Ophthalmology, Sri Sathya Sai Institute of Higher Medical Sciences, Prasanthi Gram, Andhra Pradesh, India, 515 134.

<sup>7</sup> Application Division, Agilent Technologies Ltd., Bengaluru, India.

\*To whom correspondence has to be send: Dr.Venketesh Sivaramakrishnan [svenketesh@sssihl.edu.in](mailto:svenketesh@sssihl.edu.in),

[s.venketesh@gmail.com](mailto:s.venketesh@gmail.com), and

Dr. Anuj Sharma [anujsharma85@gmail.com](mailto:anujsharma85@gmail.com)

Venketesh Sivaramakrishnan ORCID- 0000-0003-3094-5905

**Supplementary Table S3:** List of multiple reaction monitoring (MRM) for all the identified metabolites and LC-MS parameters in positive mode

MRM  
details

| Compound Name                 | ISTD | Precursor ion | Product ion | Dwell | Frag(V) | CE(V) | Cell | Polarity |
|-------------------------------|------|---------------|-------------|-------|---------|-------|------|----------|
| (L)-arginino-succinate        | No   | 291.1299      | 70          | 3     | 380     | 37    | 2    | Positive |
| 1-Methyl-Histidine            | No   | 170.0924      | 124         | 3     | 380     | 20    | 2    | Positive |
| 2-Aminobutyraldehyde          | No   | 88.0757       | 70.1        | 3     | 380     | 9     | 2    | Positive |
| 2-Aminoheptanoic acid         | No   | 146.1176      | 100.1       | 3     | 380     | 5     | 2    | Positive |
| 2-Aminooctanoic acid          | No   | 160.1332      | 55.3        | 3     | 380     | 21    | 2    | Positive |
| 2-Hydroxypyridine             | No   | 96.0444       | 78.1        | 3     | 380     | 17    | 2    | Positive |
| 2-Methyl glutamic acid        | No   | 162.0761      | 116.1       | 3     | 380     | 9     | 2    | Positive |
| 2-Methylbutyroylcarnitine     | No   | 246.17        | 187         | 3     | 380     | 15    | 2    | Positive |
| 3-Hydroxykynurenine           | No   | 225.087       | 162.1       | 3     | 380     | 17    | 2    | Positive |
| 3-PHOSPHOGLYCERATE            | No   | 187           | 141         | 3     | 380     | 15    | 2    | Positive |
| 3-phospho-serine              | No   | 186.0162      | 88          | 3     | 380     | 12    | 2    | Positive |
| 4 Acetamidobutanoic acid      | No   | 146.08        | 86.1        | 3     | 380     | 9     | 2    | Positive |
| 4 Hydroxybutyric acid         | No   | 105.0546      | 45          | 3     | 380     | 5     | 2    | Positive |
| 4-Coumarate                   | No   | 165.0446      | 119         | 3     | 380     | 10    | 2    | Positive |
| 4-Methyl-2-oxo pentanoic acid | No   | 131.0703      | 71          | 3     | 380     | 10    | 2    | Positive |
| 5-Hydroxyindoleacetic acid    | No   | 192.0655      | 146         | 3     | 380     | 10    | 2    | Positive |
| 5-oxo-proline                 | No   | 130.0499      | 84          | 3     | 380     | 10    | 2    | Positive |
| 7-methylguanosine             | No   | 299.1224      | 166         | 3     | 380     | 24    | 2    | Positive |
| Acetyl Carnitine              | No   | 204.123       | 85          | 3     | 380     | 17    | 2    | Positive |
| Acetylcholine                 | No   | 146.1176      | 43.02       | 3     | 380     | 10    | 2    | Positive |
| Adenine                       | No   | 136.6         | 119         | 3     | 380     | 10    | 5    | Positive |
| Allo-Threonine                | No   | 120.0655      | 74.1        | 3     | 380     | 5     | 2    | Positive |
| Aminobutyric acid             | No   | 104.0706      | 44.1        | 3     | 380     | 9     | 2    | Positive |
| Arginine                      | No   | 175.119       | 70.1        | 3     | 380     | 25    | 2    | Positive |
| Asparagine                    | No   | 133.0608      | 87.1        | 3     | 380     | 9     | 2    | Positive |
| Asparanine-15N2               | yes  | 135           | 117         | 3     | 380     | 15    | 2    | Positive |
| Aspartame                     | No   | 295.1288      | 180.1       | 3     | 380     | 5     | 2    | Positive |
| ASP-PH                        | No   | 281.1132      | 120.1       | 3     | 380     | 10    | 2    | Positive |
| Betaine                       | No   | 118.0863      | 59.2        | 3     | 380     | 17    | 2    | Positive |
| betaine aldehyde              | No   | 103.0992      | 58          | 3     | 380     | 21    | 2    | Positive |
| Carnitine                     | No   | 162.1125      | 60.1        | 3     | 380     | 12    | 2    | Positive |

**Supplementary Table S3:** List of multiple reaction monitoring (MRM) for all the identified metabolites and LC-MS parameters in positive mode

|                                      |     |          |         |   |     |    |   |          |
|--------------------------------------|-----|----------|---------|---|-----|----|---|----------|
| <b>Choline</b>                       | No  | 105.1148 | 45      | 3 | 380 | 21 | 2 | Positive |
| <b>citrulline</b>                    | No  | 176.103  | 159     | 3 | 380 | 5  | 2 | Positive |
| <b>Creatinine</b>                    | No  | 114.0662 | 44      | 3 | 380 | 17 | 2 | Positive |
| <b>Cystathionine</b>                 | No  | 223.0747 | 134.1   | 3 | 380 | 8  | 2 | Positive |
| <b>Cysteine 15N</b>                  | Yes | 123      | 95      | 3 | 380 | 10 | 2 | Positive |
| <b>Cystine</b>                       | No  | 241.03   | 152     | 3 | 380 | 9  | 2 | Positive |
| <b>Cytosine</b>                      | No  | 112.1    | 95.1    | 3 | 380 | 17 | 5 | Positive |
| <b>Deoxy carnitine</b>               | No  | 146.1176 | 60.1    | 3 | 380 | 13 | 2 | Positive |
| <b>Dimethyl Arginine</b>             | No  | 203.1503 | 70.1    | 3 | 380 | 29 | 2 | Positive |
| <b>DL-Pipecolic acid</b>             | No  | 130.0863 | 84      | 3 | 380 | 18 | 2 | Positive |
| <b>Ergothioneine</b>                 | No  | 230.0958 | 60.0573 | 3 | 380 | 12 | 2 | Positive |
| <b>Erythrono-1,4-lactone</b>         | No  | 119.11   | 91.1    | 3 | 380 | 10 | 2 | Positive |
| <b>Ethylmalonate/Methyl Malonate</b> | No  | 133.0495 | 115.04  | 3 | 380 | 10 | 2 | Positive |
| <b>Glucosamine/Galactosamine</b>     | No  | 180.0866 | 162     | 3 | 380 | 5  | 2 | Positive |
| <b>Glu-Glu</b>                       | No  | 277.103  | 84.04   | 3 | 380 | 10 | 2 | Positive |
| <b>Glutamic acid</b>                 | No  | 148.0604 | 84      | 3 | 380 | 17 | 2 | Positive |
| <b>Glutamine</b>                     | No  | 147.0764 | 130.1   | 3 | 380 | 5  | 2 | Positive |
| <b>Glutamyl alanine</b>              | No  | 219.0975 | 84.1    | 3 | 380 | 21 | 2 | Positive |
| <b>Glu-Tyr</b>                       | No  | 311.1238 | 293.1   | 3 | 380 | 10 | 2 | Positive |
| <b>Glycerol 3-phosphate</b>          | No  | 173.02   | 132     | 3 | 380 | 5  | 2 | Positive |
| <b>Glycine</b>                       | No  | 76.0393  | 30.5    | 3 | 380 | 33 | 2 | Positive |
| <b>Gly-Gly</b>                       | No  | 133.0608 | 30      | 3 | 380 | 20 | 2 | Positive |
| <b>Gly-Leu</b>                       | No  | 189.1234 | 130     | 3 | 380 | 10 | 2 | Positive |
| <b>Guanidine acetic acid</b>         | No  | 118.0611 | 43.1    | 3 | 380 | 40 | 2 | Positive |
| <b>Heptanoyl Carnitine</b>           | No  | 260.2    | 201.2   | 3 | 380 | 9  | 2 | Positive |
| <b>Histamine</b>                     | No  | 112.0869 | 95.1    | 3 | 380 | 13 | 2 | Positive |
| <b>Histidine</b>                     | No  | 156.0768 | 110.1   | 3 | 380 | 9  | 2 | Positive |
| <b>Homoserine</b>                    | No  | 120.0655 | 74.1    | 3 | 380 | 9  | 2 | Positive |
| <b>Hydroxyglutaric acid</b>          | No  | 132      | 45      | 3 | 380 | 30 | 2 | Positive |
| <b>Hypoxanthine</b>                  | No  | 137      | 119     | 3 | 380 | 21 | 2 | Positive |
| <b>Isobutyryl Carnitine</b>          | No  | 232.1543 | 85      | 3 | 380 | 21 | 2 | Positive |
| <b>Isoleucine</b>                    | No  | 132.1019 | 86.1    | 3 | 380 | 9  | 2 | Positive |
| <b>Isovaleryl Carnitine</b>          | No  | 246.2    | 85      | 3 | 380 | 17 | 2 | Positive |

**Supplementary Table S3:** List of multiple reaction monitoring (MRM) for all the identified metabolites and LC-MS parameters in positive mode

|                                            |     |           |          |   |     |    |   |          |
|--------------------------------------------|-----|-----------|----------|---|-----|----|---|----------|
| <b>Kynurenic acid</b>                      | No  | 190.0499  | 144.1    | 3 | 380 | 16 | 2 | Positive |
| <b>Kynurenine</b>                          | No  | 209.0921  | 192      | 3 | 380 | 5  | 2 | Positive |
| <b>Lactic acid</b>                         | No  | 91.04     | 73       | 3 | 380 | 15 | 2 | Positive |
| <b>L-anthranilic acid</b>                  | Yes | 139       | 121      | 3 | 380 | 12 | 2 | Positive |
| <b>L-Arginine</b>                          | Yes | 177.1     | 159.1    | 3 | 380 | 10 | 5 | Positive |
| <b>L-Creatinine</b>                        | Yes | 115.1     | 45.1     | 3 | 380 | 10 | 2 | Positive |
| <b>L-Jasmonic acid</b>                     | No  | 211.1     | 133.1    | 3 | 380 | 10 | 2 | Positive |
| <b>L-Tryptophan</b>                        | Yes | 207.1     | 189      | 3 | 380 | 10 | 5 | Positive |
| <b>Lysine</b>                              | No  | 147.1128  | 130.2    | 3 | 380 | 5  | 2 | Positive |
| <b>L-Zeatine</b>                           | Yes | 220       | 136      | 3 | 380 | 15 | 5 | Positive |
| <b>Methyl Adenosine</b>                    | No  | 282.1     | 150      | 3 | 380 | 13 | 2 | Positive |
| <b>Methylglutaric acid</b>                 | No  | 147.0652  | 55.05423 | 3 | 380 | 10 | 2 | Positive |
| <b>Myo-Inositol</b>                        | No  | 181.07    | 139.9    | 3 | 380 | 5  | 2 | Positive |
| <b>MYRISTATE (14:0)+Na</b>                 | No  | 250       | 173      | 3 | 380 | 21 | 2 | Positive |
| <b>Myristoleic acid</b>                    | No  | 227.2006  | 43.1     | 3 | 380 | 25 | 2 | Positive |
| <b>N, N Dimethyl Glycine</b>               | No  | 104.0706  | 44       | 3 | 380 | 48 | 2 | Positive |
| <b>N,N Dimethyl Glycine/Methyl alanine</b> | No  | 104.0706  | 58.1     | 3 | 380 | 9  | 2 | Positive |
| <b>N-acetyl Glucosamine 6 Phos</b>         | No  | 302.0635  | 284.1    | 3 | 380 | 5  | 2 | Positive |
| <b>N-Acetyl Lysine</b>                     | No  | 189.1234  | 84.1     | 3 | 380 | 24 | 2 | Positive |
| <b>N-Acetyl Methionine</b>                 | No  | 192       | 104.1    | 3 | 380 | 9  | 2 | Positive |
| <b>N-acetylalanine</b>                     | No  | 132.0655  | 44.1     | 3 | 380 | 20 | 2 | Positive |
| <b>N-acetyl-glutamine</b>                  | No  | 189.087   | 130      | 3 | 380 | 17 | 2 | Positive |
| <b>N-Acetylneuraminic acid</b>             | No  | 310.1     | 121      | 3 | 380 | 21 | 2 | Positive |
| <b>N-Acetylorithine</b>                    | No  | 175.1077  | 70.1     | 3 | 380 | 29 | 2 | Positive |
| <b>N-Acetylputrescine</b>                  | No  | 131.1179  | 114      | 3 | 380 | 12 | 2 | Positive |
| <b>Nicotinamide</b>                        | No  | 123.0553  | 80.1     | 3 | 380 | 20 | 2 | Positive |
| <b>Nonadecanoic acid</b>                   | No  | 298.2866  | 281.4    | 3 | 380 | 10 | 2 | Positive |
| <b>Octonyl Carnitine</b>                   | No  | 288.2     | 85       | 3 | 380 | 21 | 2 | Positive |
| <b>Oleic acid</b>                          | No  | 283.27    | 89.2     | 3 | 380 | 13 | 2 | Positive |
| <b>Phe-Glu</b>                             | No  | 295.12889 | 136.07   | 3 | 380 | 20 | 2 | Positive |
| <b>Phenyl alanine</b>                      | No  | 166.0963  | 120.1    | 3 | 380 | 13 | 2 | Positive |
| <b>Proline</b>                             | No  | 116.0706  | 70.1     | 3 | 380 | 17 | 2 | Positive |
| <b>Propeonyl Carnitine</b>                 | No  | 218.1387  | 85       | 3 | 380 | 17 | 2 | Positive |

**Supplementary Table S3:** List of multiple reaction monitoring (MRM) for all the identified metabolites and LC-MS parameters in positive mode

|                   |    |          |        |   |     |    |   |          |
|-------------------|----|----------|--------|---|-----|----|---|----------|
| purine            | No | 121.0509 | 94     | 3 | 380 | 25 | 2 | Positive |
| Putrescine        | No | 89.1073  | 72.1   | 3 | 380 | 8  | 2 | Positive |
| Pyroglu-Va        | No | 229.1183 | 183.11 | 3 | 380 | 10 | 2 | Positive |
| Quinic acid       | No | 193.0707 | 111.04 | 3 | 380 | 10 | 2 | Positive |
| Sarcosine/Alanine | No | 90.055   | 44.1   | 3 | 380 | 20 | 2 | Positive |
| Serine            | No | 106.0499 | 60.1   | 3 | 380 | 9  | 2 | Positive |
| Spermidine        | No | 146.1652 | 72.1   | 3 | 380 | 17 | 2 | Positive |
| Tyrosine          | No | 182.0812 | 136.1  | 3 | 380 | 9  | 2 | Positive |
| Uracil            | No | 113      | 72     | 3 | 380 | 4  | 2 | Positive |
| Urea              | No | 61.0396  | 44     | 3 | 380 | 10 | 2 | Positive |
| Valine            | No | 118.0863 | 72.2   | 3 | 380 | 9  | 2 | Positive |
| Xanthine          | No | 153.04   | 110    | 3 | 380 | 21 | 2 | Positive |

| <b>Source Parameters</b>     |              |           |
|------------------------------|--------------|-----------|
| Parameter                    | Value (+)    | Value (-) |
| Gas Temp (°C)                | 250          | 250       |
| Gas Flow (l/min)             | 14           | 14        |
| Nebulizer (psi)              | 20           | 20        |
| SheathGasHeater              | 350          | 350       |
| SheathGasFlow                | 12           | 12        |
| Capillary (V)                | 3000         | 3000      |
| VCharging                    | 1000         | 1000      |
| <b>Ion Funnel Parameters</b> |              |           |
| Pos High Pressure RF         | 150          |           |
| Pos Low Pressure RF          | 60           |           |
| Neg High Pressure RF         | 150          |           |
| Neg Low Pressure RF          | 60           |           |
| <b>Auxiliary</b>             |              |           |
| Draw Speed                   | 100.0 µL/min |           |
| Eject Speed                  | 100.0 µL/min |           |
| Draw Position Offset         | 0.0 mm       |           |
| Wait Time After Drawing      | 2.0 s        |           |
| Sample Flush Out Factor      | 5.0          |           |

**Supplementary Table S3:** List of multiple reaction monitoring (MRM) for all the identified metabolites and LC-

## MS parameters in positive mode

|                          |                             |
|--------------------------|-----------------------------|
| Vial/Well bottom sensing | Yes                         |
| <b>Injection</b>         |                             |
| Injection Mode           | Injection with needlewash   |
| Injection Volume         | 2.00 µL                     |
| <b>Needle Wash</b>       |                             |
| Needle Wash Location     | Flush Port                  |
| Wash Time                | 10.0 s                      |
| Flow                     | 0.300 mL/min                |
| Use Solvent Types        | Yes                         |
| Stroke Mode              | Synchronized                |
| Low Pressure Limit       | 0.00 bar                    |
| High Pressure Limit      | 600.00 bar                  |
| Max. Flow Ramp Up        | 100.000 mL/min <sup>2</sup> |
| Max. Flow Ramp Down      | 100.000 mL/min <sup>2</sup> |
| Expected Mixer           | No check                    |
| <b>Stop Time</b>         |                             |
| Stoptime Mode            | Time set                    |
| Stoptime                 | 23.00 min                   |
| Post time mode           | Time set                    |
| Post time                | 5.00min                     |

**Supplementary Table S3:** List of multiple reaction monitoring (MRM) for all the identified metabolites and LC-MS parameters in positive mode

**Timetable**

|                            | Time      | Function                   | Parameter                             |              |        |         |
|----------------------------|-----------|----------------------------|---------------------------------------|--------------|--------|---------|
| 1                          | 3.00 min  | Change Solvent Composition | Solvent Composition A:70.00%B:30.00 % |              |        |         |
| 2                          | 3.00 min  | ChangeFlow                 | Flow: 0.3 mL/min                      |              |        |         |
| 3                          | 12.00 min | Change Solvent Composition | Solvent Composition A:98.00%B:2.00 %  |              |        |         |
| 4                          | 12.00 min | ChangeFlow                 | Flow: 0.3 mL/min                      |              |        |         |
| 5                          | 15.00 min | Change Solvent Composition | Solvent Composition A:98.00%B:2.00 %  |              |        |         |
| 6                          | 15.00 min | ChangeFlow                 | Flow: 0.3 mL/min                      |              |        |         |
| 7                          | 16.00 min | Change Solvent Composition | Solvent Composition A:15.00%B:85.00 % |              |        |         |
| 8                          | 16.00 min | ChangeFlow                 | Flow: 0.3 mL/min                      |              |        |         |
| 9                          | 23.00 min | Change Solvent Composition | Solvent Composition A:15.00%B:85.00 % |              |        |         |
| 10                         | 23.00 min | ChangeFlow                 | Flow: 0.3 mL/min                      |              |        |         |
|                            |           |                            |                                       |              |        |         |
| <b>Solvent Composition</b> |           |                            |                                       |              |        |         |
|                            | Channel   | Ch.1 Solv.                 | Name 1                                | Ch2Solv.     | Name 2 | Percent |
| 1                          | A         | 100.0 %Water               | 0.1FA                                 | 100.0 %Water |        | 15.00%  |
| 2                          | B         | 100.0 %Acetonitrile        | 100 %CAN                              | 100.0%Ac     | 0.1FA  | 85.00%  |
