# Supplementary material for: Elevated dimethylarginine, ATP, cytokines, metabolic remodeling involving tryptophan metabolism and potential microglial inflammation characterize primary open angle glaucoma
Source: PubMed Central journal article supplement (PMC8105335; doi:10.1038/s41598-021-89137-z), 2021-05-07
Supplement: 41598_2021_89137_MOESM9_ESM.pdf [file 41598_2021_89137_MOESM9_ESM.pdf]

**Supplementary Table S4:** List of multiple reaction monitoring (MRM) for all the identified metabolites and LC-MS parameters in negative mode

**Elevated Dimethylarginine, ATP, cytokines, metabolic remodeling involving tryptophan metabolism and potential microglial inflammation characterize Primary Open Angle Glaucoma**

Sujith Kumar Pulukool<sup>1</sup>, Sai Krishna Srimadh Bhagavatham<sup>1</sup>, Vishnu Kannan<sup>1,2</sup>, Piruthivi Sukumar<sup>3</sup>, Rajesh Babu Dandamudi<sup>4,5</sup>, Shamika Ghaisas<sup>6</sup>, Haripriya Kunchala<sup>6</sup>, Darshan Saieesh<sup>1</sup>, Ashwin Ashok Naik<sup>1</sup>, Ashish Pargaonkar<sup>7</sup>, Anuj Sharma<sup>6\*</sup>, Venketesh Sivaramakrishnan<sup>1\*</sup>

<sup>1</sup>Disease Biology Lab, SSSIHL-Agilent Center for Excellence in Multiomics and Cell Sciences, Dept. of Biosciences, Sri Sathya Sai Institute of Higher Learning, Prasanthi Nilayam, Andhra Pradesh, India, 515 134.

<sup>2</sup> Current address: Dept. of Botany/Biotechnology, CMS College, Kottayam. India 686 001.

<sup>3</sup> Leeds institute of Cardiovascular and Metabolic medicine, School of medicine, University of Leeds, Leeds, UK

<sup>4</sup> Previous Address: SSSIHL-Agilent Center for Excellence in Multiomics and Cell Science, Dept. of Chemistry, Sri Sathya Sai Institute of Higher Learning, Prasanthi Nilayam, Andhra Pradesh, India, 515 134.

<sup>5</sup> Current address: Phenomenex India, Hyderabad, Telangana, India- 500 084.

<sup>6</sup> Department of Ophthalmology, Sri Sathya Sai Institute of Higher Medical Sciences, Prasanthi Gram, Andhra Pradesh, India, 515 134.

<sup>7</sup> Application Division, Agilent Technologies Ltd., Bengaluru, India.

\*To whom correspondence has to be send: Dr.Venketesh Sivaramakrishnan

[svenketesh@sssihl.edu.in](mailto:svenketesh@sssihl.edu.in), [s.venketesh@gmail.com](mailto:s.venketesh@gmail.com), and

Dr. Anuj Sharma [anujsharma85@gmail.com](mailto:anujsharma85@gmail.com) -

Venketesh Sivaramakrishnan ORCID- 0000-0003-3094-5905

**Supplementary Table S4:** List of multiple reaction monitoring (MRM) for all the identified metabolites and LC-MS parameters in negative mode

**MRM Details**

| Compound Name                    | ISTD | Precursor ion | Product ion | Dwell | Frag (V) | CE (V) | Cell Acc (V) | Polarity |
|----------------------------------|------|---------------|-------------|-------|----------|--------|--------------|----------|
| MALTOTETRAOSE                    | No   | 665.2         | 161.1       | 20    | 380      | 13     | 5            | Negative |
| NAD+ _neg                        | No   | 662           | 540         | 20    | 380      | 21     | 4            | Negative |
| glutathione disulfide _neg       | No   | 611           | 306         | 20    | 380      | 30     | 4            | Negative |
| UDP-N-acetyl-glucosamine         | No   | 606           | 385         | 20    | 380      | 28     | 4            | Negative |
| UDP-D-glucuronate                | No   | 579           | 403         | 20    | 380      | 26     | 4            | Negative |
| UDP-D-glucose                    | No   | 565           | 323         | 20    | 380      | 25     | 4            | Negative |
| cholesteryl sulfate              | No   | 465.2         | 97          | 20    | 380      | 39     | 4            | Negative |
| dGDP _neg                        | No   | 426.12        | 159         | 20    | 380      | 27     | 4            | Negative |
| ADP _neg                         | No   | 426.1         | 159         | 20    | 380      | 27     | 4            | Negative |
| trehalose-6-Phosphate            | No   | 421           | 79          | 20    | 380      | 36     | 4            | Negative |
| Cholestrol                       | No   | 385.3         | 217.7       | 20    | 380      | 8      | 5            | Negative |
| Farnesyl-PP                      | No   | 381           | 189.7       | 20    | 380      | 40     | 5            | Negative |
| Farnesyl-PP                      | No   | 381           | 78.7        | 20    | 380      | 40     | 5            | Negative |
| L-Gibberilic acid                | No   | 345           | 143         | 20    | 380      | 29     | 2            | Negative |
| L-Gibberilic acid                | Yes  | 345           | 143         | 3     | 380      | 5      | 2            | Negative |
| Maltose                          | No   | 341.1         | 161         | 20    | 380      | 5      | 5            | Negative |
| Maltose                          | No   | 341.1         | 73          | 20    | 380      | 21     | 5            | Negative |
| FBP/GBP                          | No   | 338.9         | 96.8        | 20    | 380      | 15     | 5            | Negative |
| FBP/GBP                          | No   | 338.9         | 79          | 20    | 380      | 60     | 5            | Negative |
| octulose-monophosphate (O8P-O1P) | No   | 319           | 97          | 20    | 380      | 22     | 4            | Negative |
| Eicosatetraenoic acid-D8 (ETA)   | Yes  | 311.5         | 245.194     | 3     | 380      | 20     | 2            | Negative |
| Eicasatetraenoic acid-D8 (ETA)   | Yes  | 311.5         | 59.05       | 3     | 380      | 35     | 2            | Negative |
| D-sedoheptulose-1-7-phosphate    | No   | 289           | 97          | 20    | 380      | 27     | 4            | Negative |
| Stearic acid                     | No   | 283.48        | 265.2       | 20    | 380      | 40     | 2            | Negative |
| Stearic acid                     | No   | 283.48        | 45          | 20    | 380      | 40     | 2            | Negative |
| 6-phospho-D-gluconate            | No   | 275           | 97          | 20    | 380      | 13     | 4            | Negative |
| inosine                          | No   | 267           | 135         | 20    | 380      | 27     | 4            | Negative |
| S-ribosyl-L-homocysteine _neg    | No   | 266           | 134         | 20    | 380      | 20     | 4            | Negative |
| 1,3-diphopshateglycerate         | No   | 265           | 79          | 20    | 380      | 37     | 4            | Negative |
| L-palmitic acid                  | No   | 264           | 155.8       | 20    | 380      | 15     | 2            | Negative |
| L-palmitic acid                  | No   | 264           | 146         | 20    | 380      | 15     | 2            | Negative |

**Supplementary Table S4:** List of multiple reaction monitoring (MRM) for all the identified metabolites and LC-MS parameters in negative mode

|                                |     |         |        |    |     |    |   |          |
|--------------------------------|-----|---------|--------|----|-----|----|---|----------|
| Fructose-6-Phosphate           | No  | 259     | 97.1   | 20 | 380 | 5  | 5 | Negative |
| Glucose-6-Phosphate            | No  | 259     | 97     | 20 | 380 | 5  | 5 | Negative |
| Fructose-6-Phosphate           | No  | 259     | 79.1   | 20 | 380 | 37 | 5 | Negative |
| hexose-phosphate               | No  | 259     | 79     | 20 | 380 | 42 | 4 | Negative |
| uridine                        | No  | 243     | 200    | 20 | 380 | 21 | 4 | Negative |
| Tetradecanoic acid-D3 (TDA-D3) | Yes | 230.3   | 212.2  | 3  | 380 | 40 | 2 | Negative |
| Tetradecanoic acid-D3 (TDA-D3) | Yes | 230.3   | 59     | 3  | 380 | 40 | 2 | Negative |
| Tetradecanoic acid-D3 (TDA-D3) | Yes | 230.3   | 58     | 3  | 380 | 40 | 2 | Negative |
| Ribose-5-phosphate             | No  | 229.01  | 138.98 | 20 | 380 | 15 | 5 | Negative |
| Ribose-5-phosphate             | No  | 229.01  | 96.97  | 20 | 380 | 15 | 5 | Negative |
| L-Zeatine                      | No  | 218     | 173    | 20 | 380 | 10 | 2 | Negative |
| Zeatine                        | Yes | 218     | 173    | 3  | 380 | 10 | 2 | Negative |
| L-Zeatine                      | No  | 218     | 133.5  | 20 | 380 | 21 | 2 | Negative |
| L-Jasmonic acid                | No  | 209     | 126.9  | 20 | 380 | 10 | 2 | Negative |
| L-Jasmonic acid                | Yes | 209     | 126.9  | 3  | 380 | 10 | 2 | Negative |
| L-Jasmonic acid                | No  | 209     | 59     | 20 | 380 | 9  | 2 | Negative |
| L-Jasmonic acid                | Yes | 209     | 59     | 3  | 380 | 10 | 2 | Negative |
| L-Tryptophan                   | No  | 205     | 117    | 20 | 380 | 13 | 2 | Negative |
| L-Tryptophan                   | Yes | 205     | 117    | 3  | 380 | 10 | 2 | Negative |
| Citrate-13c6                   | Yes | 197     | 90     | 3  | 380 | 20 | 2 | Negative |
| Glucuronic acid                | No  | 193     | 113    | 20 | 380 | 5  | 5 | Negative |
| Glucuronic acid                | No  | 193     | 73.1   | 20 | 380 | 9  | 5 | Negative |
| 3-phosphoglycerate             | No  | 185     | 97     | 20 | 380 | 17 | 4 | Negative |
| Glucose-13C6                   | Yes | 185     | 74     | 3  | 380 | 7  | 2 | Negative |
| Glucose-13C6                   | Yes | 185     | 60.8   | 3  | 380 | 20 | 2 | Negative |
| 3PG and 2PG                    | No  | 184.9   | 97     | 20 | 380 | 13 | 5 | Negative |
| N-acety AA-d3                  | Yes | 177     | 132.7  | 20 | 380 | 6  | 2 | Negative |
| N-acety AA-d3                  | Yes | 177     | 90.8   | 20 | 380 | 6  | 2 | Negative |
| N-Aetyl Aspartic acid          | No  | 174     | 88.1   | 20 | 380 | 13 | 5 | Negative |
| shikimate                      | No  | 173     | 93     | 20 | 380 | 20 | 4 | Negative |
| sn-glycerol-3-phosphate        | No  | 171     | 79     | 20 | 380 | 15 | 4 | Negative |
| Uric acid                      | No  | 167.001 | 124    | 20 | 380 | 17 | 4 | Negative |
| PEP                            | No  | 167     | 79     | 20 | 380 | 9  | 5 | Negative |
| PEP                            | No  | 167     | 63     | 20 | 380 | 60 | 5 | Negative |
| allantoin                      | No  | 157.05  | 114    | 20 | 380 | 17 | 4 | Negative |
| dihydroorotate                 | No  | 157     | 113    | 20 | 380 | 14 | 4 | Negative |

**Supplementary Table S4:** List of multiple reaction monitoring (MRM) for all the identified metabolites and LC-MS parameters in negative mode

|                           |     |         |       |    |     |    |   |          |
|---------------------------|-----|---------|-------|----|-----|----|---|----------|
| 2,3-dihydroxybenzoic acid | No  | 153     | 109   | 20 | 380 | 19 | 4 | Negative |
| L-Glutamic acid D5        | No  | 151     | 107   | 20 | 380 | 13 | 2 | Negative |
| Glutamic acid-D5          | Yes | 151     | 107   | 3  | 380 | 5  | 2 | Negative |
| Glutamic acid D5          | Yes | 151     | 107   | 3  | 380 | 13 | 2 | Negative |
| Glutamine-15N2            | Yes | 147     | 111   | 3  | 380 | 9  | 2 | Negative |
| Glutamine                 | No  | 145     | 109   | 20 | 380 | 9  | 5 | Negative |
| Ketoglutarate             | No  | 145     | 101.1 | 20 | 380 | 5  | 5 | Negative |
| Glutamine                 | No  | 145     | 84    | 20 | 380 | 13 | 5 | Negative |
| Ketoglutarate             | No  | 145     | 57.1  | 20 | 380 | 20 | 5 | Negative |
| Octanoic acid             | No  | 143.1   | 125.1 | 20 | 380 | 20 | 2 | Negative |
| acetylphosphate           | No  | 139     | 79    | 20 | 380 | 24 | 4 | Negative |
| L-Anthranilic acid        | No  | 137     | 93.1  | 20 | 380 | 15 | 2 | Negative |
| L-Anthranilic acid        | No  | 137     | 65.2  | 20 | 380 | 20 | 2 | Negative |
| p-aminobenzoate           | No  | 136.05  | 92    | 20 | 380 | 18 | 4 | Negative |
| anthranilate              | No  | 136     | 92    | 20 | 380 | 18 | 4 | Negative |
| Malic acid                | No  | 133     | 115.1 | 20 | 380 | 5  | 5 | Negative |
| Malic acid                | No  | 133     | 71.1  | 20 | 380 | 9  | 5 | Negative |
| Hydroxyisocaproic acid    | No  | 131.006 | 85.1  | 20 | 380 | 16 | 4 | Negative |
| taurine                   | No  | 124     | 80    | 20 | 380 | 18 | 4 | Negative |
| Fumarate                  | Yes | 119     | 74    | 3  | 380 | 5  | 2 | Negative |
| Succinic acid             | No  | 117     | 99.9  | 20 | 380 | 10 | 5 | Negative |
| succinate                 | No  | 117     | 73    | 20 | 380 | 12 | 4 | Negative |
| Fumaric acid              | No  | 115     | 71.1  | 20 | 380 | 5  | 5 | Negative |
| Fumaric acid              | No  | 115     | 27.2  | 20 | 380 | 5  | 5 | Negative |
| Malonate (Propanedioate)  | No  | 103.1   | 59.1  | 20 | 380 | 5  | 5 | Negative |
| Malonate (Propanedioate)  | No  | 103.1   | 41.1  | 20 | 380 | 29 | 5 | Negative |
| HBA                       | No  | 103     | 59.1  | 20 | 380 | 5  | 5 | Negative |
| HBA                       | No  | 103     | 41.1  | 20 | 380 | 25 | 5 | Negative |
| Pyruvate                  | Yes | 89      | 44    | 3  | 380 | 10 | 2 | Negative |
| Pyruvate                  | Yes | 89      | 44    | 3  | 380 | 10 | 2 | Negative |
| lactate                   | No  | 89      | 43.2  | 20 | 380 | 16 | 4 | Negative |
| glycolate                 | No  | 75      | 45.2  | 20 | 380 | 13 | 4 | Negative |

**Supplementary Table S4:** List of multiple reaction monitoring (MRM) for all the identified metabolites and LC-MS parameters in negative mode

**Source Parameters**

| Parameter        | Value (+) | Value (-) |
|------------------|-----------|-----------|
| Gas Temp (°C)    | 250       | 250       |
| Gas Flow (l/min) | 14        | 14        |
| Nebulizer (psi)  | 20        | 20        |
| SheathGasHeater  | 350       | 350       |
| SheathGasFlow    | 11        | 11        |
| Capillary (V)    | 3000      | 3500      |
| VCharging        | 1000      | 1000      |

**Ion Funnel Parameters**

|                      |     |
|----------------------|-----|
| Pos High Pressure RF | 150 |
| Pos Low Pressure RF  | 60  |
| Neg High Pressure RF | 150 |
| Neg Low Pressure RF  | 60  |

**Auxiliary**

|                          |              |
|--------------------------|--------------|
| Draw Speed               | 100.0 µL/min |
| Eject Speed              | 100.0 µL/min |
| Draw Position Offset     | 0.0 mm       |
| Wait Time After Drawing  | 2.0 s        |
| Sample Flush Out Factor  | 5.0          |
| Vial/Well bottom sensing | Yes          |

**Supplementary Table S4:** List of multiple reaction monitoring (MRM) for all the identified metabolites and LC-MS parameters in negative mode

**Timetable**

|    | Time      | Function                   | Parameter                               |
|----|-----------|----------------------------|-----------------------------------------|
| 1  | 3.00 min  | Change Solvent Composition | Solvent composition A: 70.00 % B:30.00% |
| 2  | 3.00 min  | Change Flow                | Flow: 0.3 mL/min                        |
| 3  | 12.00 min | Change Solvent Composition | Solvent composition A: 98.00 % B:2.00 % |
| 4  | 12.00 min | Change Flow                | Flow: 0.3 mL/min                        |
| 5  | 15.00 min | Change Solvent Composition | Solvent composition A: 98.00 % B:2.00 % |
| 6  | 15.00 min | Change Flow                | Flow: 0.3 mL/min                        |
| 7  | 16.00 min | Change Solvent Composition | Solvent composition A: 15.00 % B:85.00% |
| 8  | 16.00 min | Change Flow                | Flow: 0.3 mL/min                        |
| 9  | 23.00 min | Change Solvent Composition | Solvent composition A: 15.00 % B:85.00% |
| 10 | 23.00 min | Change Flow                | Flow: 0.3 mL/min                        |

**Solvent Composition**

|   | Channel | Ch. 1 Solv.               | Name 1               | Ch2 Solv.                 | Name 2               | Selected | Used | Percent |
|---|---------|---------------------------|----------------------|---------------------------|----------------------|----------|------|---------|
| 1 | A       | 100.0 % Water V.03        | pH 9 95% water 5%ACN | 100.0 % Water V.03        | pH 9 95% water 5%ACN | Ch. 2    | Yes  | 15.00 % |
| 2 | B       | 100.0 % Acetonitrile V.03 | 100% ACN             | 100.0 % Acetonitrile V.03 | 100% ACN             | Ch. 2    | Yes  | 85.00 % |
