# Supplementary material for: Elevated dimethylarginine, ATP, cytokines, metabolic remodeling involving tryptophan metabolism and potential microglial inflammation characterize primary open angle glaucoma
Source: PubMed Central journal article supplement (PMC8105335; doi:10.1038/s41598-021-89137-z), 2021-05-07
Supplement: 41598_2021_89137_MOESM10_ESM.pdf [file 41598_2021_89137_MOESM10_ESM.pdf]

**Supplementary Table S5:** List of primers used in Quantitative PCR with NCBI sequence number

**Elevated Dimethylarginine, ATP, cytokines, metabolic remodeling involving tryptophan metabolism and potential microglial inflammation characterize Primary Open Angle Glaucoma**

Sujith Kumar Pulukool<sup>1</sup>, Sai Krishna Srimadh Bhagavatham<sup>1</sup>, Vishnu Kannan<sup>1,2</sup>, Piruthivi Sukumar<sup>3</sup>, Rajesh Babu Dandamudi<sup>4,5</sup>, Shamika Ghaisas<sup>6</sup>, Haripriya Kunchala<sup>6</sup>, Darshan Saieesh<sup>1</sup>, Ashwin Ashok Naik<sup>1</sup>, Ashish Pargaonkar<sup>7</sup>, Anuj Sharma<sup>6\*</sup>, Venketesh Sivaramakrishnan<sup>1\*</sup>

<sup>1</sup> Disease Biology Lab, SSSIHL-Agilent Center for Excellence in Multiomics and Cell Sciences, Dept. of Biosciences, Sri Sathya Sai Institute of Higher Learning, Prasanthi Nilayam, Andhra Pradesh, India, 515 134.

<sup>2</sup> Current address: Dept. of Botany/Biotechnology, CMS College, Kottayam. India 686 001.

<sup>3</sup> Leeds institute of Cardiovascular and Metabolic medicine, School of medicine, University of Leeds, Leeds, UK

<sup>4</sup> Previous address: SSSIHL-Agilent Center for Excellence in Multiomics and Cell Science, Dept. of Chemistry, Sri Sathya Sai Institute of Higher Learning, Prasanthi Nilayam, Andhra Pradesh, India, 515 134.

<sup>5</sup> Current address: Phenomenex India, Hyderabad, Telangana, India-500 084

<sup>6</sup> Department of Ophthalmology, Sri Sathya Sai Institute of Higher Medical Sciences, Prasanthi Gram, Andhra Pradesh, India, 515 134.

<sup>7</sup> Application Division, Agilent Technologies Ltd., Bengaluru, India.

\* To whom correspondence has to be send: Dr. Venketesh Sivaramakrishnan [svenketesh@sssihl.edu.in](mailto:svenketesh@sssihl.edu.in), [s.venketesh@gmail.com](mailto:s.venketesh@gmail.com), and Dr. Anuj Sharma [anujsharma85@gmail.com](mailto:anujsharma85@gmail.com)

**Supplementary Table S5: List of primers used in Quantitative PCR with NCBI sequence number**

| <b>Gene</b>       | <b>Accession number</b> | <b>Forward Primer (5'-3')</b> | <b>Reverse primer (5'-3')</b>   |
|-------------------|-------------------------|-------------------------------|---------------------------------|
| HPRT              | NM_013556.2             | AGG GAT TTG AAT CAC GTT TG    | TTT ACT GGC AAC ATC AAC AG      |
| TNF $\alpha$      | NM_013693.3             | TCT TCT GTC TAC TGA ACT TCG G | AAG ATG ATC TGA GTG TGA GGG     |
| IFN $\gamma$      | NM_008337.4             | GAA AGA CAA TCA GGC CAT CAG C | GCA TCC TTT TTC GCC TTG CT      |
| TGF $\beta$       | NM_011577.2             | GAA CCA AGG AGA CGG AAT ACA G | GGA GTT TGT TAT CTT TGC TGT CAC |
| IDO-1             | NM_008324.2             | AAT CGC AGC TTC TCC TGC AA    | TAG CTA TGT CGT GCA GTG CC      |
| IDO-2             | NM_145949.2             | CAT CCA GGA TAT CAC CAG AG    | CGG ATG ACC GAG TAA AAT ATG     |
| TDO2              | NM_019911.2             | ACT ACC TTC TGA GTA AAG GTG   | GTG TCA ATG TCC ATA AGT GAG     |
| P2X <sub>1</sub>  | NM_008771.3             | TTG GAG TGG CCA CAG TTC TC    | CCC ATG TCC TCC GCA TAC TT      |
| P2X <sub>2</sub>  | NM_001310701.1          | TCT TGC TCC AGC TCT GCT CT    | GTG GAG TCC TGT TGG GAA GG      |
| P2X <sub>4</sub>  | NM_001310720.1          | CTA CAG GGA CCT TGC TGG C     | CAA ACT TGC CAG CCT TTC CA      |
| P2X <sub>5</sub>  | NM_001376983.1          | CTG GAA CTG GCC CAG AGT G     | TCA CGA AGG CAT TCT CCT GG      |
| P2X <sub>7</sub>  | NM_001038839.3          | ATC GAG ATC TAC TGG GAT TG    | GTA CTT GGC ATA TCT GAA GTT G   |
| P2Y <sub>2</sub>  | NM_001302346.1          | GCA TAT GTG AGT GAA GAA CTG   | TAT TGA TGG TGC TAT TCC AG      |
| P2Y <sub>4</sub>  | NM_020621.4             | TAG GTC CCA GCC CAA GTT CT    | CCC AGC ACA AAG ACA ACT GC      |
| P2Y <sub>6</sub>  | NM_183168.2             | TTA GCT TCC AGC GCT ACC TG    | CAC GAC TCC ACA CAC TAC CC      |
| P2Y <sub>14</sub> | NM_001287124.1          | GCT GAC TTT CTC ATG GGC CT    | AGA CCC TGC ACA CAA ACA CA      |
